17 **ABSTRACT**

18 Lecithin:cholesterol acyltransferase (LCAT) and LCAT-activating small molecules are being  
19 investigated as treatments for coronary heart disease (CHD) and familial LCAT deficiency  
20 (FLD). Herein we report the crystal structure of LCAT bound to a potent activator and an acyl  
21 intermediate-like inhibitor, thereby revealing an active conformation of LCAT and that the  
22 activator is bound exclusively to its membrane-binding domain (MBD). Functional studies  
23 indicate that the compound does not modulate the affinity of LCAT for HDL, but instead  
24 stabilizes residues in the MBD and likely facilitates channeling of substrates into the active site.  
25 By demonstrating that these activators increase the activity of an FLD variant, we show that  
26 compounds targeting the MBD have therapeutic potential. In addition, our data better define the  
27 acyl binding site of LCAT and pave the way for rational design of LCAT agonists and improved  
28 biotherapeutics for augmenting or restoring reverse cholesterol transport in CHD and FLD  
29 patients.

30 Coronary heart disease (CHD) is the leading cause of death in the world and typically develops  
31 as the result of atherosclerotic plaque build-up in the arteries. Risk for CHD is inversely related  
32 to high-density lipoprotein (HDL) cholesterol (HDL-C) levels in plasma. In reverse cholesterol  
33 transport (RCT), HDL receives cholesterol from cholesterol-enriched macrophages, which is  
34 then esterified by lecithin:cholesterol acyltransferase (LCAT) bound to HDL. LCAT  
35 preferentially catalyzes hydrolysis of the *sn*-2 acyl group from phosphatidylcholine (lecithin) and  
36 its transfer to cholesterol, creating a cholesteryl ester (CE), which partitions to the hydrophobic  
37 core of the HDL particle (Calabresi et al., 2012). This process drives the maturation of discoidal  
38 pre- $\beta$  HDL to spherical  $\alpha$ -HDL and promotes further cholesterol efflux from arterial plaques  
39 (Glomset, 1968).

40  
41 LCAT esterification of cholesterol in HDL is promoted by ApoA-I, the most abundant structural  
42 apolipoprotein in HDL (Fielding et al., 1972; Jonas, 2000). The structural determinants that  
43 underlie ApoA-I activation of LCAT are poorly understood, but some clues have been provided  
44 by a series of crystal structures of LCAT (Gunawardane et al., 2016; Manthei et al., 2017; Piper  
45 et al., 2015) and the closely-related lysosomal phospholipase A2 (LPLA2) (Glukhova et al.,  
46 2015). Both enzymes contain an  $\alpha/\beta$ -hydrolase domain and two accessory domains referred to as  
47 the membrane-binding domain (MBD) and cap domain. The MBD contains hydrophobic  
48 residues important for LPLA2 to bind liposomes and for LCAT to bind HDLs. Protruding from  
49 the cap domain is an active site lid that has been observed in multiple conformations. In the case  
50 of LCAT, crystallographic and hydrogen/deuterium exchange mass spectrometry (HDX MS)  
51 studies suggest that the lid blocks the active site in its inactive state, and opens in response to the  
52 binding of substrates and, presumably, upon interaction with HDL (Manthei et al., 2017). The lid

53 region is also important for HDL-binding (Cooke et al., 2018; Glukhova et al., 2015; Manthei et  
54 al., 2017), and thus we hypothesize that activation imposed by ApoA-I involves conformational  
55 changes in LCAT that stabilize its lid in an open state that is more competent to bind substrates.  
56 To date, over 90 genetic mutations in LCAT have been described and are responsible for two  
57 phenotypes of LCAT deficiency: fish eye disease (FED), wherein patients retain residual LCAT  
58 activity, particularly on apoB-containing lipoproteins, and familial LCAT deficiency (FLD),  
59 wherein patients exhibit a total loss of LCAT activity (Kuivenhoven et al., 1997; Rousset et al.,  
60 2009). Both are characterized by low levels of HDL-C and corneal opacities, but FLD presents  
61 additional serious symptoms including anemia, proteinuria, and progressive renal disease, the  
62 main cause of morbidity and mortality in these patients (Ahsan et al., 2014; Ossoli et al., 2016;  
63 Rousset et al., 2011). Novel treatments for raising HDL-C largely based on cholesteryl ester  
64 transfer protein inhibition have failed to protect against CHD in clinical trials (Kingwell et al.,  
65 2014; Rader, 2016). Therefore, there is currently great interest in investigating alternative  
66 pathways for modulating HDL metabolism. In particular, the focus has switched from raising  
67 HDL-C to developing drugs that increase the beneficial properties of HDL, such as cholesterol  
68 efflux, which is enhanced by LCAT (Czarnecka and Yokoyama, 1996). New treatments that  
69 increase LCAT activity could therefore be beneficial for both FLD and CHD patients.

70  
71 Recombinant human LCAT (rhLCAT), which raises HDL-C and increases cholesterol efflux, was  
72 shown to be safe in a phase I study (Shamburek et al., 2016b) and is now in phase II trials for  
73 CHD. This same rhLCAT has also been tested in enzyme replacement therapy for one patient  
74 with FLD with encouraging results (Shamburek et al., 2016a). However, small molecule  
75 activators would be less expensive and easier to administer than a biotherapeutic. Previously,



76 Amgen identified Compound A (3-(5-(ethylthio)-1,3,4-thiadiazol-2-ylthio)pyrazine-2-  
77 carbonitrile)), which binds covalently to Cys31 in the active site of LCAT and increases plasma  
78 CE and HDL-C levels in mice and hamsters (Chen et al., 2012; Freeman et al., 2017; Kayser et  
79 al., 2013). Other sulfhydryl-reactive compounds based on monocyclic  $\beta$ -lactams have also been  
80 shown to activate LCAT (Freeman et al., 2017). Although highlighting the promise of LCAT-  
81 activating molecules, these compounds are expected to have many off-target effects. Recently,  
82 Daiichi Sankyo reported a new class of reversible small molecule activators that have  
83 demonstrated the ability to activate LCAT isolated from human plasma (Kobayashi et al., 2016;  
84 Kobayashi et al., 2015a; Kobayashi et al., 2015b; Onoda et al., 2015), and increased HDL-C up  
85 to 1000-fold when orally administered to cynomolgus monkeys (Onoda et al., 2015).

86  
87 Here we determined the structure of LCAT bound to both a Daiichi Sankyo  
88 piperidinylpyrazolopyridine activator and isopropyl dodecyl fluorophosphonate (IDFP), a  
89 covalent inhibitor that mimics an acylated reaction intermediate, in which the enzyme adopts an  
90 active conformation with an open lid. The activator binds in a pocket formed exclusively by the  
91 MBD but does not influence affinity of LCAT for HDL. The lid, which contains positions  
92 mutated in FLD, undergoes a large conformational change from that observed in inactive LCAT  
93 structures. We show that variants of Arg244 within the lid recover acyltransferase activity when  
94 treated with a piperidinylpyrazolopyridine activator, highlighting the promise of compounds that  
95 target the MBD for many missense FLD variants. Our results provide a better understanding of  
96 the key conformational changes that LCAT undergoes during activation, insight into how the  
97 enzyme alters its conformation in response to acyl substrates, and a rational framework for the  
98 design of new small molecule LCAT modulators.

## 99 RESULTS

### 100 Characterization of LCAT activators

101 We first synthesized and confirmed the ability of three recently reported  
102 piperidinylpyrazolopyridine and piperidinylimidazopyridine LCAT activators (Kobayashi et al.,  
103 2015a; Onoda et al., 2015) (compounds **1-3**, Figure 1a) to activate hydrolysis of 4-  
104 methylumbelliferyl palmitate (MUP) by full-length LCAT (Figure 1b). All three activated LCAT  
105 greater than 2-fold, with EC<sub>50</sub> values of 160, 280 and 320 nM for **1**, **2**, and **3**, respectively (Table  
106 1, 2). We also examined the acyltransferase activity of LCAT with dehydroergosterol (DHE)  
107 incorporated in peptide-based HDLs in response to compound **2**, as it has lower background  
108 fluorescence in this assay. We observed that **2** activates LCAT 2.8-fold with an EC<sub>50</sub> of 280 nM  
109 (Table 1, Figure 1c). To gain insight into the mechanism of activation, we determined the V<sub>max</sub>  
110 and K<sub>m</sub> values for the DHE assay with and without 5 μM compound **2**. The V<sub>max</sub> increased from  
111 22 to 37 μM DHE-ester hr<sup>-1</sup>, whereas the K<sub>m</sub> was not significantly changed (11 μM vs. 6.6 μM  
112 with **2**) (Figure 1d).

113  
114 We next examined the ability of compound **1** to modulate HDL-binding by pre-incubating the  
115 compound with LCAT and then monitoring the kinetics of LCAT binding to ApoA-I HDLs with  
116 bio-layer interferometry (BLI). There was no change in the k<sub>on</sub>, k<sub>off</sub>, or overall K<sub>d</sub> in BLI, and  
117 thus the compounds do not appear to act by increasing LCAT affinity for HDL (Table 3, Figure  
118 1e, S1a). The activators did however increase the melting temperature (T<sub>m</sub>) of LCAT (ΔT<sub>m</sub> from  
119 values of 2.7 – 5.0 °C), similar to that which occurs upon reaction of LCAT with isopropyl  
120 dodecyl fluorophosphate (IDFP) (ΔT<sub>m</sub> = 7 °C) (Manthei et al., 2017) (Figure 1f-g). A K<sub>d</sub> value  
121 of 100 ± 14 nM was determined for compound **1** binding to LCAT via microscale thermophoresis  
122 (MST) (Figure S1b).

## 123 **Structure of activated LCAT**

124 With the goal of visualizing an active conformation of LCAT, we examined the combined ability  
125 of both **1** and IDFP to stabilize  $\Delta\text{N}\Delta\text{C}$ -LCAT (residues 21-397), a truncation variant that lacks  
126 the dynamic N- and C-termini of the enzyme and thus is more readily crystallized (Glukhova et  
127 al., 2015; Gunawardane et al., 2016; Manthei et al., 2017; Piper et al., 2015). The ligands had an  
128 additive effect ( $\Delta T_m$  of 12.7 °C), suggesting that the two ligands have distinct, non-overlapping  
129 binding sites (Figure 1f-g). Because increased protein stability improves the chances of obtaining  
130 crystals,  $\Delta\text{N}\Delta\text{C}$ -LCAT incubated with both IDFP and **1** ( $\Delta\text{N}\Delta\text{C}$ -IDFP·**1**) was thus subjected to  
131 crystallization trials. An additional benefit was that the ligands were also expected to also trap an  
132 active conformation of LCAT. The resulting structure was determined using diffraction data to  
133 3.1 Å spacings (Figure 2, Table 4). Crystals could not be obtained without both ligands. There  
134 are two protomers of  $\Delta\text{N}\Delta\text{C}$ -IDFP·**1** in the asymmetric unit with a root mean square deviation  
135 (RMSD) of 0.35 Å for all C $\alpha$  atoms, indicating nearly identical conformations (Krissinel and  
136 Henrick, 2004). Density was observed for residues spanning 21-397 of chain A and 21-395 of  
137 chain B, although in both chains a portion of the lid is disordered (239-240 in chain A and 236-  
138 242 in chain B).

139  
140 Strong omit map density is observed for both **1** and portions of IDFP (Figure 2b, d). Compound **1**  
141 binds in a groove formed by the MBD of each subunit, burying 380 Å<sup>2</sup> of accessible surface area  
142 of the protein (Pettersen et al., 2004) (Figure 2b-c). The bicyclic head of **1** binds in a pocket  
143 chiefly formed by the b1-b2 loop and a1 and a2 helices (nomenclature as in LPLA2 (Glukhova et  
144 al., 2015)), including the Cys50-Cys74 disulfide bond (Figure 2a-c). Its pyrazole ring donates  
145 and accepts a hydrogen bond with the backbone carbonyl and amide of Met49 and Tyr51,

146 respectively, which mandates the hydrogen to be on the 2-position of the ring (Figure S2a,  
147 Compound **1-b**). The C4 hydroxyl donates a hydrogen bond to the side chain of Asp63, and the  
148 C6 carbonyl accepts a hydrogen bond from the side chain of Asn78. The C4 trifluoromethyl  
149 group is buried against the  $\alpha 1$  and  $\alpha 2$  helices. Thus, although compound **1** was synthesized as a  
150 racemic mixture at the C4 position, the binding site is only compatible with the *R* enantiomer  
151 (Figure S2a, Compound **1-c**). For simplicity, in future descriptions the compound in the structure  
152 is still referred to as compound **1**. The stereochemical preference is consistent with previous  
153 observations that one optical enantiomer of a given activator is typically at least ten-fold more  
154 potent than the other (Kobayashi et al., 2015a; Kobayashi et al., 2015b). The pyrazole moiety  
155 packs between the side chain of Tyr51 and the Cys50-Cys74 disulfide. The central piperidine  
156 ring of **1** forms van der Waals contacts, but also positions the terminal pyrazine ring of **1** in a  
157 hydrophobic cleft formed by the side chains of Met49, Leu68, Pro69, and Leu70 (Figure 2b).  
158 One edge of the pyrazine moiety also participates in crystal lattice contacts with residues in the  
159  $\alpha A$ - $\alpha A'$  loop (residues 111-119), a region proposed to be involved in cholesterol binding  
160 (Glukhova et al., 2015; Manthei et al., 2017), although these lattice contacts are distinct in each  
161 chain (Figure S3a-b). This contact may explain why similar crystals could not be obtained with  
162 compounds **2** and **3**, which have bulky trifluoromethyl substitutions for the pyrazine cyano  
163 group.

164

165 Notably, the binding site for **1** is also occupied in some prior LCAT and LPLA2 crystal structures  
166 (Figure 3a-b), either by a Phe-Tyr dipeptide of an inhibitory Fab fragment (Fab1) (PDB entries  
167 4XWG, 4XX1, 5BV7) (Gunawardane et al., 2016; Piper et al., 2015) or by a HEPES molecule in  
168 structures of LPLA2 (Glukhova et al., 2015), indicating that the MBD in the LCAT/LPLA2

169 family is a robust binding site for diverse chemical matter. Because the 4XWG and 4XX1  
170 structures (referred to as LCAT–Fab1) of LCAT adopt what seems to be an inactive conformation  
171 (Manthei et al., 2017; Piper et al., 2015), general occupation of the activator binding site is  
172 however insufficient to trigger a global conformational transition in LCAT.

173  
174 The strongest omit density for IDFP corresponds to its phosphonate head group, which is  
175 covalently bound to Ser181 and occupies the oxyanion hole (Figure 2d-e). The density is  
176 progressively weaker beyond the phosphonate, and the alkyl chain past the C2 carbon is not  
177 observed. However, the location of IDFP in our structure and the dynamic nature of the alkyl  
178 chain is consistent with results from the LPLA2-IDFP structure (PDB entry 4X91), wherein  
179 multiple conformations of bound IDFP revealed two hydrophobic tracks likely used for binding  
180 the acyl chains of phospholipid substrates (Glukhova et al., 2015) (Figure S3c). Indeed, there is a  
181 similar hydrophobic track corresponding to track A that takes a straighter path to the back of the  
182 LCAT as compared the one observed for LPLA2, which results from the different orientations of  
183 their lids (Figure S3b-c). We previously used HDX MS to show that IDFP stabilizes elements in  
184 the MBD and the lid region of LCAT (Manthei et al., 2017). This data is in agreement with what  
185 we observe in the crystal structure of  $\Delta N\Delta C$ -IDFP·1, in that residues 67-72 in the MBD and  
186 residues 226-236 in the lid have markedly lower temperature factors in the structure reported  
187 here as compared to LCAT structures without IDFP (Figure S4).

188  
189 **Comparison with prior LCAT structures reveals a global conformational switch**  
190 Reported atomic structures of LCAT include that of full-length LCAT wherein its lid extends  
191 over and shields the active site (PDB entry 5TXF, LCAT-closed), LCAT in complex with

192 inhibitory Fab1 (LCAT–Fab1), and LCAT in complex with Fab1 and a second agonistic Fab  
193 fragment (27C3) (entry 5BV7, 27C3–LCAT–Fab1; Figure 3c). In these structures, the N- and C-  
194 termini are disordered except for an N-terminal pentapeptide in the 27C3–LCAT–Fab1 structure  
195 (containing mutations L4F/N5D) that docks in the active site of a neighboring symmetry mate. It  
196 is unclear which of these structures, if any, represent an activated conformation of LCAT,  
197 although the LCAT–Fab1 and LCAT-closed structures are more similar to each other and likely  
198 to be inactive, whereas 27C3–LCAT–Fab1 has a more exposed active site. The conformation of  
199 the active site lid is highly variable among these three structures.

200  
201 The  $\Delta$ N $\Delta$ C-IDFP·1 structure affords a high-resolution view of LCAT in what is expected to be a  
202 fully activated conformation unobstructed by conformational changes that might be induced by  
203 Fab binding. The structure of LCAT here is most similar to that in 27C3–LCAT–Fab1 (RMSD  
204 0.70 Å for all C $\alpha$  atoms) (Gunawardane et al., 2016; Krissinel and Henrick, 2004), including in  
205 their active site lid regions and in the relative configuration of their three domains (Figure S4a-  
206 b). The active site lid can be divided into two regions, with the C-terminal portion (residues 233-  
207 249) being most consistent between the two structures. Both structures contain similar disordered  
208 segments (residues 236-242 in 27C3–LCAT–Fab1, chain A residues 239-240 and chain B  
209 residues 236-242 in  $\Delta$ N $\Delta$ C-IDFP·1). The N-terminal portion of the lid (residues 225-232) is most  
210 variable, although it is consistent between the two unique chains of the  $\Delta$ N $\Delta$ C-IDFP·1 structure  
211 and, given the substrate analog, more likely to adopt a physiological conformation. Indeed, the  
212 N-terminal pentapeptide of a symmetry mate in the 27C3–LCAT–Fab1 structure would clash  
213 with Asn228 in the lid region of  $\Delta$ N $\Delta$ C-IDFP·1. Regardless, such differences highlight the high

214 plasticity of the active site, which is likely required for LCAT to accommodate its various lipidic  
215 substrates.

216

217 Comparison of the structure of LCAT-closed with  $\Delta$ N $\Delta$ C-IDFP-**1** provides a unique glimpse of  
218 how LCAT transitions from inactive to active states (Movie S1). Domain motion analysis  
219 (Hayward and Berendsen, 1998) reveals two hinge regions: residues 219-229 and 251-255  
220 (Movie S2). The dihedral angles between Asn228-Gln229 and Gln229-Gly230 undergo a large  
221 rotation that flips the lid region away from the active site in the  $\Delta$ N $\Delta$ C-IDFP-**1** complex. On the  
222 other end of the lid, the  $\alpha$ 5 helix of the cap domain unwinds in the lid open state, with the  
223 dihedral angles between Pro250-Trp251 undergoing the most change (Figure 3c-d, Movie S2).  
224 The lid transition is accompanied by a 4° change in the orientation of the adjacent cap domain  
225 relative to both the  $\alpha/\beta$ -hydrolase and MBD, which remain fixed with respect to each other  
226 (Figure 3c, Movie S1). Interestingly, in all reported LCAT structures the binding site for  
227 compound **1** is accessible (with obvious exception of those in complex with Fab1, which takes  
228 advantage of the same site), regardless of the orientation of the cap domain. In other words,  
229 initial HDL-binding and subsequent occupation of the active site by a ligand are most likely  
230 responsible for triggering the lid opening and rearrangement of the cap domain we observe in the  
231 structure, and not the binding of **1**.

232

233 As these conformational changes in the lid and reorientation of the cap domain occur, there are  
234 resulting alterations within the active site that facilitate binding to substrates. In LPLA2, two  
235 distinct tracks for the acyl chains of lipid substrates were observed (Figure S3c) (Glukhova et al.,  
236 2015). Track A is furthest from the lid loop and is only solvent-accessible when the lid is

237 retracted, and the  $\alpha 5$  helix, including hinge residue Trp251, unwinds and moves inwards to block  
238 this track in the closed lid conformation of LCAT-closed (Figure S5). In the lid-open structures,  
239 Lys218 moves with the cap domain away from the MBD in the activated conformation, where it  
240 would be in better position to bind the phosphate in the substrate lipid head group (Glukhova et  
241 al., 2015) (Figure S5a).

242

### 243 **Structure-activity relationships**

244 The structure of the  $\Delta N\Delta C$ -IDFP-**1** complex confirms the structure-activity relationships we and  
245 others have observed for the pyrazolopyridine scaffold. The hydrogen bonds formed by the  
246 pyrazole ring with the backbone carbonyl of Met49 and amide of Tyr51 (Figure 2b-c) indicate  
247 that **1-b** is the dominant tautomerized isoform in the co-crystallized structure (Figure S2a).  
248 Although the exchange of pyrazole (**2**) to imidazole (**3**) eliminates the hydrogen bond with  
249 Met49, this resulted in only a minimal change in  $EC_{50}$  (280 and 320 nM for **2** and **3**,  
250 respectively) and no change in the maximum response (Table 1, 2). However, interruption of  
251 both of these hydrogen bonds by swapping the pyrazole (**2**) for isoxazole (**9**, Figure S2b)  
252 dramatically increased the  $EC_{50}$  to 7.7  $\mu M$  and decreased the response to 1.6-fold (Table 2, 5). It  
253 was previously shown that removal of the C4 hydroxyl group (**4**, Figure S2b), which interacts  
254 with Asp63 in the structure, caused a ~6-fold drop in potency compared with **2** (Kobayashi et al.,  
255 2015a; Kobayashi et al., 2015b). This is consistent with elimination of the hydroxyl group of **3** to  
256 give the more planar structure of **8** (Figure S2b) which decreased the potency to 4.6  $\mu M$ , yet  
257 interestingly it activated LCAT with increased efficacy of 3.7-fold (Table 2, 5). Surprisingly,  
258 although the bicyclic head of these compounds is expected to play an important role in the  
259 retention of potency, the imidazole-containing head group of **3** has no activating effect at



260 concentrations up to 10  $\mu\text{M}$  (**6**, Figure S2b), perhaps due to loss of favorable interactions with  
261 Met49. Consistent with the above data, compounds **6**, **8**, and **9** could not thermal stabilize LCAT  
262 at 10  $\mu\text{M}$  in DSF, although **8** could at 100  $\mu\text{M}$  (Figure S6a). MST further confirmed that **6** was  
263 unable to bind to LCAT (Figure S6b). Thus, in this series of activators, potency and efficacy are  
264 therefore highly dependent on a hydroxyl and chirality at the C4 position, as well as maintenance  
265 of a pyrazine ring system that likely assists in interactions with hydrophobic substrates.

266

### 267 **Perturbation of the activator binding site**

268 To further validate the crystal structure and better understand the mechanistic role of the MBD,  
269 we exchanged residues in the activator binding site of LCAT with their equivalents in LPLA2,  
270 which is not stabilized by **1** or related compounds (Figure 1g). The Y51S, G71I, and Y51S/G71I  
271 (Figure 3a) variants were thus expected to be impaired in binding. These variants exhibited  
272 similar or higher  $T_m$  values than WT LCAT, and were able to hydrolyze both the soluble  
273 substrate *p*-nitrophenyl butyrate (pNPB) and the micellar substrate MUP (Figure 4, S7),  
274 indicating an intact fold. As expected, **1** was far less effective at increasing the  $T_m$  of the three  
275 variants compared to WT (Figure 4a). The Y51S/G71I variant also exhibited a nearly 4-fold  
276 decrease in HDL binding affinity and a reduced ability to catalyze acyl transfer (Figure 4b-c, S8).  
277 These results are consistent with recent studies probing nearby positions at Trp48 (mutated to  
278 Ala) and Leu70 (mutated to Ser) (Manthei et al., 2017) or the analogous positions in LPLA2  
279 (Glukhova et al., 2015). Conversely, the analogous LPLA2 chimeric variants (S33Y, I53G, and  
280 S43Y/I53G) had lower  $T_m$  values relative to WT (Figure 4a). However, these variants remained  
281 unable to be stabilized by **1**. We were unable to express and test a triple mutant expected to fully  
282 restore binding (S33Y/I53G/L48N).

283 Compound **1** did not stimulate pNPB esterase activity for any variant of LCAT (Figure S7b), and  
284 in fact seemed to inhibit the activity of WT. Perturbation of the activator binding site decreased  
285 this effect. Compound **1** and related compounds activated hydrolysis in the MUP assay (Figure  
286 4d, Table 1, 2). The EC<sub>50</sub> of Y51S with **1** was 4-fold higher than WT at 0.59 μM, G71I had an  
287 EC<sub>50</sub> > 5 μM, and Y51S/G71I had no response at concentrations up to 10 μM **1**. We confirmed  
288 these results in a DHE acyltransferase assay with the Y51S/G71I variant, wherein the mutation  
289 failed to increase activity in the presence of compound **2** (Figure 4c, e, Table 1). These results  
290 confirm that the binding site for **1** in the crystal structure is responsible for the biochemical  
291 effects observed in solution.

292

### 293 **Recovery of activity in an FLD variant**

294 Arg244 is a position commonly mutated in LCAT genetic disease (R244G (McLean, 1992;  
295 Vrabec et al., 1988), R244H (Pisciotta et al., 2005; Sampaio et al., 2017; Strom et al., 2011),  
296 R244C (Charlton-Menys et al., 2007), and R244L (Castro-Ferreira et al., 2018)) and its side  
297 chain forms unique interactions in the observed active and inactive states of LCAT. In data  
298 obtained from patient plasma, the amount of LCAT-R244G isolated from homozygotes was  
299 ~25% of the amount from WT LCAT plasma and there was ~15% of WT LCAT activity, whereas  
300 heterozygotes of the R244G and R244H mutations had ~80% and ~50% of WT LCAT activity,  
301 respectively (Pisciotta et al., 2005; Vrabec et al., 1988), thus supporting an important role for this  
302 residue. Arg244 is found in the lid of LCAT and interacts with the backbone carbonyls of Leu223  
303 and Leu285 in ΔNΔC-IDFP-**1**, and with the side chain of Asp335 in the lid closed state of LCAT-  
304 closed (Figure 5a, Movie S1). We hypothesized that molecules targeting the MBD could restore  
305 some stability and function of mutations at Arg244 because this residue does not participate in

306 the binding site for **1**. The LCAT-R244A and -R244H variants were purified and shown to be  
307 less stable than WT with  $\Delta T_m$  values of -2.3 and -2.4 °C, respectively, consistent with Arg244  
308 playing an important structural role (Figure 5b, S7a). Both LCAT-R244A and -R244H exhibited  
309 WT levels of pNPB activity, but 44% and 78% of WT in the MUP hydrolysis assay (Figure S7b-  
310 c). In HDL binding analyses, both variants had an increased  $k_{off}$  (2-fold for R244A and 3.5-fold  
311 for R244H) which led to an increase in their overall  $K_d$  values (Figure S8, Table 3). For R244H,  
312 the  $k_{on}$  was also decreased from 0.091 (WT) to 0.022  $\mu\text{M}^{-1} \text{s}^{-1}$ . Thus, in the context of HDL  
313 binding, the histidine mutant is less tolerated, perhaps due to steric clashes in the lid open  
314 conformation. Neither variant had substantial activity in the acyltransferase assay (Figure 5c),  
315 consistent with their contribution to FLD.

316  
317 R244A and R244H were both stabilized by the addition of compound **1** ( $\Delta T_m$  of 6.0 and 4.8 °C,  
318 respectively, Figure 5b). R244A, R244H, and WT LCAT all exhibited similar  $EC_{50}$  values in  
319 response to **1** in the MUP esterase assay (~150 nM), with all three variants being activated about  
320 2-fold by compounds **1-3** (Figure 5d, Table 1, 2). In the DHE acyltransferase assay, the  $EC_{50}$   
321 values in the presence of saturating **2** were 0.28, 0.76, and  $\geq 4.6 \mu\text{M}$  for WT, R244A, and  
322 R244H, respectively (Figure 5e, Table 1). At the highest concentration tested (10  $\mu\text{M}$  compound  
323 **2**), the acyltransferase rate was 18 and 26  $\mu\text{M h}^{-1}$  for R244A and R244H, respectively, both  
324 greater than WT LCAT which had a rate of 11  $\mu\text{M h}^{-1}$  at the lowest concentration of **2** examined.  
325 The activator affected HDL binding of the two Arg244 variants differently. For R244A,  
326 compound **1** decreased the  $k_{on}$  from 0.069 to 0.017  $\mu\text{M}^{-1} \text{s}^{-1}$ , which increases the  $K_d$  from 3.2 to  
327 11  $\mu\text{M}$ . For R244H, compound **1** enhanced binding to HDL by reducing the  $k_{off}$  from 0.40 to 0.15  
328  $\text{s}^{-1}$ , reducing the  $K_d$  from 18 to 4.3  $\mu\text{M}$  (Figure S8, Table 3). Thus, piperidinylpyrazolopyridine

329 and piperidinylimidazopyridine activators like **1** can partially rescue defects in activity for  
330 LCAT-Arg244 variants.

331

## 332 **DISCUSSION**

333 Here we have defined a novel activator binding site in the MBD of LCAT as well as the active  
334 conformation of LCAT, and have demonstrated that these activators can restore the activity of  
335 some FLD variants. However, the mechanism of activation mediated by **1** and its analogs is not  
336 straightforward. The activators do not alter the binding constant of WT LCAT for HDL (Figure  
337 1e, Table 3), suggesting that they do not contribute to HDL binding despite occupying a site in  
338 the MBD. Thus, one would expect that the residues that interact with **1** would not be involved in  
339 HDL binding, or else these compounds would act as inhibitors. However, the site is closely  
340 juxtaposed with residues that are definitely involved in HDL binding. Important HDL-binding  
341 residues such as Trp48 and Leu70 are adjacent to the activator binding site (Manthei et al.,  
342 2017), and the double mutant Y51S/G71I was 4-fold decreased in its affinity for HDLs due to a  
343 defect in the  $k_{\text{off}}$ , and lost acyltransferase activity (Figure 4, Table 3). A G71R variant has also  
344 been reported in LCAT genetic disease (Hörl et al., 2006).

345

346 The compounds increase activity of WT LCAT up to 3.7-fold, specifically by increasing the  
347  $V_{\text{max}}$ , although remote from the catalytic triad and IDFP binding site (Figure 1, Table 2). The  
348 typical mechanism for acting at a distance would be allostery, wherein ligand binding induces a  
349 conformational change that alters the active site. Indeed,  $\Delta\text{N}\Delta\text{C-IDFP}\cdot\mathbf{1}$  adopts what we believe  
350 is a more active state with alterations in the active site that should promote activity. However, the  
351 MBD of LCAT does not appreciably change its orientation with respect to the hydrolase domain

352 in any reported structure thus far, and the activator binding site seems available regardless of  
353 LCAT conformation. Moreover, the increase in  $T_m$  caused by IDFP and compound **1** is additive,  
354 not synergistic (Figure 1f-g), and our previous HDX MS data suggested that IDFP alone can  
355 stabilize LCAT in an active, lid open conformation that is likely represented by the current  
356 structure (Manthei et al., 2017). Thus, IDFP is more likely to be the driver of the observed global  
357 conformation change observed in the crystal structure of  $\Delta N\Delta C$ -IDFP·**1**. Although both ligands  
358 stabilize, they do so via independent mechanisms and **1** may only do so locally.

359  
360 Thus, we hypothesize that the activators such as **1** act by stabilizing the MBD and facilitating  
361 substrate entry into the active site cleft of the enzyme. In support of such a model, we note that  
362 the two chains of LCAT in the asymmetric unit of the  $\Delta N\Delta C$ -IDFP·**1** crystals pack to form a  
363 pseudo-symmetric homodimer utilizing an interface with many of the hydrophobic residues from  
364 the MBD including Trp48, Leu64, Phe67, Leu68, Pro69, Leu70 and Leu117 from the  $\alpha A$ - $\alpha A'$   
365 loop (Figure S3a, S9). The interface is centered on the side chains of Leu64 and Phe67. The  
366 pyrazine ring of the activator is prominently featured in this hydrophobic surface. This  
367 hydrophobic ring packs next to residues in the MBD well-known to be important for membrane  
368 interactions, such as the conspicuously solvent exposed Trp48 side chain (Figure S9a). This same  
369 interface was also proposed by a recent molecular dynamics study exploring the ability of LCAT  
370 to dock to a model membrane in both the closed and open conformations (Casteleijn et al.,  
371 2018). In the closed conformation, the active site lid blocks Leu64, Phe67, and Leu117 from  
372 being able to access membranes, though the rest of the MBD and the hydrophobic N-terminus of  
373 LCAT, which is also key for HDL binding (Manthei et al., 2017), would still be available (Figure  
374 S9b). The simulations in this study also suggested that residues such as Phe67 were involved in

375 promoting transfer of lipids into the active site tunnel of the enzyme. Mutation of Arg244, unlike  
376 compound **1**, clearly affects binding to HDL, and thus this residue, or the lid region in which it  
377 resides, could be a major ApoA-I binding determinant (Figure S8, Table 3). Indeed, a recent  
378 paper identified a crosslink between LCAT and ApoA-I at nearby residue Lys240 within the lid  
379 (Cooke et al., 2018).

380  
381 A better understanding of how ligands fit within the activator pocket enables rational design to  
382 create more potent and effective LCAT activators. For example, our crystal structure revealed the  
383 preferred enantiomer of bound piperidinyipyrazolopyridines, thus one could expect at least two-  
384 fold higher potency could be achieved with an enantiopure preparation. A recent patent has  
385 improved the potency of these compounds 3-fold by using an optically pure compound, as well  
386 as adding a hydroxyl to the C5 position on the bicyclic head, which our structure indicates would  
387 add a second hydrogen bond with the side chain of Asp63 (Kobayashi et al., 2016). Furthermore,  
388 we have shown that there is potential to increase the efficacy of the compounds, as **8** activated  
389 3.7-fold as compared to the parent compounds activating an average of 2.3-fold. However, **8** had  
390 lowered potency, and so more modulations will be required to determine if potency and efficacy  
391 can be improved simultaneously.

392  
393 The ability to perform rational design is important because we also demonstrated here the  
394 therapeutic potential of using small molecule activators targeting the MBD in FLD patients. We  
395 focused on mutations at Arg244 (Castro-Ferreira et al., 2018; Charlton-Menys et al., 2007;  
396 McLean, 1992; Pisciotta et al., 2005; Sampaio et al., 2017; Strom et al., 2011; Vrabec et al.,  
397 1988) because of its apparent role in the switch mechanism of the active site lid, but in principle

398 any patient harboring an alternative missense mutation that does not directly perturb the  
399 hydrolase active site may also benefit from this compound series. Even a relatively small  
400 increase in activity could potentially slow or reverse the progression of renal disease in some  
401 FLD patients because FED patients with only partial LCAT activity do not develop renal disease  
402 (Ahsan et al., 2014). Certainly, treatment with a small molecule activator would be more cost  
403 effective and easier for patients comply with than rhLCAT enzyme replacement therapy. In future  
404 experiments, it will be important to examine the utility of activators like **1** for other FLD  
405 variants. Lastly, because these compounds were demonstrated to effectively increase HDL-C in  
406 monkeys with normal levels of LCAT (Kobayashi et al., 2016; Kobayashi et al., 2015a;  
407 Kobayashi et al., 2015b; Onoda et al., 2015), it will be important to continue to interrogate their  
408 mechanism and determine if they also increase cholesterol efflux and promote atherosclerotic  
409 plaque regression. If so, then activation of LCAT by a small molecule approach and improving  
410 HDL function could be widely used in the primary prevention of cardiovascular disease and  
411 would likely complement our existing drugs for lowering LDL-C, such as statins and PCSK9-  
412 inhibitors.

413

## 414 **MATERIALS AND METHODS**

### 415 **Cell Culture, Protein Production, and Purification**

416 To produce protein for crystallographic screens, a stable cell line expressing  $\Delta N\Delta C$ -LCAT was  
417 created in HEK293F cells. A codon-optimized human  $\Delta N\Delta C$ -LCAT construct with a C-terminal  
418 6x histidine-tag in pcDNA4 was SspI digested and transfected into HEK293F cells (Invitrogen).  
419 Cells were selected with zeocin and grown in adherent culture on 150 mm plates in Dulbecco's  
420 Modified Eagle Medium high glucose medium with GlutaMAX and 1 mM pyruvate

421 (ThermoFisher), supplemented with 10% fetal bovine serum (Sigma), 100 U/ml penicillin, 100  
422  $\mu\text{g/ml}$  streptomycin and  $50 \mu\text{g mL}^{-1}$  zeocin. Kifunensine (Cayman Chemical) was added to  $5 \mu\text{M}$   
423 once the cells were confluent to prevent complex glycosylation. Conditioned media was  
424 harvested every 5 days, purified via Ni-NTA, dialyzed against reaction buffer (20 mM HEPES  
425 pH 7.5, 150 mM NaCl), and then frozen. For crystallographic trials, samples were thawed and  
426 subsequently cleaved with a 1:3 endoglycosidase H:LCAT molar ratio in reaction buffer  
427 supplemented with 100 mM NaOAc pH 5.2 for 2.5 h at room temperature, which reduces the  
428 heterogeneous *N*-glycans to single *N*-acetylglucosamines. HEPES pH 8 was then added to 100  
429 mM prior to re-purification via Ni-NTA to remove the glycosidase, and finally LCAT was  
430 polished via tandem Superdex 75 size exclusion chromatography (SEC) in reaction buffer (20  
431 mM HEPES pH 7.5, 150 mM NaCl).

432  
433 Protein for biochemical analysis was made using pcDNA4 containing the codon-optimized  
434 human LCAT gene with a C-terminal 6x histidine-tag, which was transiently transfected in  
435 HEK293F (Invitrogen) cells as previously described (Glukhova et al., 2015). The cells were  
436 grown in suspension in FreeStyle (ThermoFisher) medium supplemented with  $100 \text{ U mL}^{-1}$   
437 penicillin and  $100 \mu\text{g mL}^{-1}$  streptomycin, and conditioned media was harvested 5 d later. The  
438 secreted protein was purified via Ni-NTA and dialyzed against reaction buffer. The LCAT  
439 proteins used in pNPB, MUP, and DSF experiments were further polished via Superdex 75 SEC  
440 to remove any background contaminating reactivity.

441

442

443



#### 444 **Crystallization and Structure Determination**

445  $\Delta$ N $\Delta$ C-LCAT was derivatized with isopropyl dodecyl fluorophosphonate (IDFP, Cayman  
446 Chemical) to give  $\Delta$ N $\Delta$ C-IDFP in reaction buffer as previously described (Manthei et al., 2017).  
447  $\Delta$ N $\Delta$ C-IDFP at 5 mg mL<sup>-1</sup> was incubated with 1 mM compound **1** for 30 min at room  
448 temperature in reaction buffer with 1% DMSO. Sparse matrix screens were set with a Crystal  
449 Gryphon (Art Robbins Instruments). Initial crystals of  $\Delta$ N $\Delta$ C-IDFP·**1** were obtained via sitting  
450 drop vapor diffusion from the Index HT screen (Hampton). Crystals formed at 20 °C in a 1  $\mu$ L  
451 drop with a protein to mother liquor ratio of 1:1. The crystals were optimized to a final condition  
452 of 0.25 M lithium sulfate, 0.1 M Tris pH 8.5, and 16% PEG 3350 via hanging drop vapor  
453 diffusion, and cryoprotected by moving the crystals to buffer with 0.2 M lithium sulfate, 0.1 M  
454 Tris pH 8.5, and 24% PEG 3350, and 20% glycerol. Crystals were frozen in nylon cryoloops  
455 (Hampton), and the data were collected at the Advanced Photon Source (APS) at Argonne  
456 National Laboratories on the LS-CAT 21-ID-G ( $\lambda=0.97857$ ) beam line. The data were processed  
457 and scaled with HKL2000 (Otwinowski and Minor, 1997). The closed LCAT structure (PDB  
458 5TXF) with the lid removed (residues 226-249) was used as a search model in molecular  
459 replacement with PHASER (McCoy et al., 2007) to generate initial phases. Non-crystallographic  
460 symmetry (NCS) restraints were applied to the two copies of LCAT per asymmetric unit during  
461 refinement in REFMAC5 (Murshudov et al., 2011) and Phenix (Adams et al., 2010) but removed  
462 during the final rounds of refinement. Reciprocal space refinement alternated with manual model  
463 building in Coot (Emsley et al., 2010). A Ni<sup>2+</sup> was observed coordinated by a portion of the  
464 exogenous His-tag beginning at residue 398 of chain A and aided in crystal packing. The final  
465 model was validated for stereochemical correctness with MolProbity (Chen et al., 2010).  
466

467 **Soluble Esterase Assay**

468 The esterase assay was performed as previously described (Glukhova et al., 2015) at least in  
469 triplicate. pNPB (Sigma-Aldrich) was diluted to 10 mM into reaction buffer containing 10%  
470 dimethylsulfoxide. The reaction was started by addition of 40  $\mu$ L 1  $\mu$ M LCAT containing either  
471 3.2 % DMSO or 11.1  $\mu$ M compound **1** to 10  $\mu$ L of pNPB. The increase in absorbance at 400 nm  
472 was monitored on a Spectramax plate reader for 15 min. Significance was determined using a  
473 one-way analysis of variance followed by Tukey's multiple comparisons post-test in GraphPad  
474 Prism.

475

476 **MUP Hydrolysis Assay**

477 The lipase activity of LCAT was measured using MUP as a substrate. The assay was performed  
478 at room temperature in 0.1 M sodium phosphate buffer, pH 7.4 containing 0.01% Triton X-100. 4  
479  $\mu$ L of LCAT (6 nM final concentration) were dispensed into a 1536-well Greiner solid black  
480 plate. The same volume of assay buffer was dispensed into column 1 and 2 for a no-enzyme  
481 control. Then 23 nL DMSO or compounds titrated at 11-point 1:3 dilution series starting at 10  
482 mM were transferred using a pintoole. After 15 min incubation, 2  $\mu$ L MUP (16  $\mu$ M final  
483 concentration) was added to initiate the reaction. The hydrolysis of MUP was monitored using a  
484 ViewLux plate reader (excitation 380 nm/emission 450nm) for 20 min. The fluorescence signal  
485 was normalized against no-activator and no-enzyme control after subtraction of background  
486 signal (t=0 min). To plot percent activation, in each assay 100% was set at the rate of LCAT or  
487 LCAT variant without compound. The resulting data were fitted to a sigmoidal dose response  
488 curve.

489

## 490 **Differential Scanning Fluorimetry**

491  $T_m$  values were determined using an Applied Biosystems QuantStudio 7 Flex qPCR machine  
492 with two replicates performed at least in triplicate. LCAT at 0.05 mg mL<sup>-1</sup> was diluted into  
493 reaction buffer containing 5X Sypro Orange (Invitrogen) in a final volume of 10 µL in 384-well  
494 PCR plates. DMSO or compound **1** was added so that all reactions contained 3% DMSO. The  
495 reactions were run from 25-95 °C with a ramp rate of 0.03 °C s<sup>-1</sup>.  $T_m$  values were determined as  
496 the derivative using Protein Thermal Shift software. Significance was determined using a one-  
497 way analysis of variance followed by Tukey's multiple comparisons post-test in GraphPad Prism.

498

## 499 **MST Binding Assay**

500 MST was used to determine the binding affinity of the compounds to LCAT. Recombinant  
501 proteins were labeled with a fluorophore using the Monolith His-tag labeling RED-Tris-NTA  
502 2nd Generation kit (Nanotemper Technologies) following manufacturer's protocol. Compounds  
503 were titrated in a two-fold dilution series starting at 20 µM and incubated with the same volume  
504 of 100 nM labeled recombinant protein for 5 min at room temperature. Measurements were  
505 carried out in PBS containing 0.05% Tween-20 and standard capillaries using a Monolith  
506 NT.115 instrument (Nanotemper Technologies) with 50% LED excitation power, 60% MST  
507 power, MST on-time of 30 s and off-time of 5 s.  $K_d$  values were calculated by fitting the  
508 thermophoresis signal at 20 s of the thermograph using MO.AffinityAnalysis software  
509 (Nanotemper Technologies).

510

511

512

## 513 **Bio-Layer Interferometry**

514 A FortéBio Octet RED system was used to measure the binding of LCAT to ApoA-I HDLs.  
515 HDLs were prepared with 1,2-dipalmitoyl-sn-glycero-3-phosphocholine (DPPC, Avanti), 1-  
516 palmitoyl-2-oleoyl-sn-glycero-3-phosphocholine (POPC, NOF America), and 16:0 biotinyl Cap  
517 PE (Avanti) in a ratio of 49.5:49.5:1 (Manthei et al., 2017). HDLs were diluted 1/20 in assay  
518 buffer (1X PBS pH 7.4, 1 mM EDTA, 60  $\mu$ M fatty acid free bovine serum albumin (Sigma-  
519 Aldrich)) and then immobilized on streptavidin tips for 600 s, followed by a wash in assay buffer  
520 for 600 s to remove unbound HDLs. The tips were then moved to buffer containing DMSO or  
521 compound **1** and allowed to equilibrate for 120 s before a baseline was established for 30 s. The  
522 tips were then moved into LCAT protein in assay buffer (containing DMSO or 10  $\mu$ M **1**) or  
523 buffer alone (with DMSO or 10  $\mu$ M **1**) as a control and allowed to associate for 200 s, and then  
524 dissociated in assay buffer for 480 s. All steps were performed at 25 °C with shaking at 1000  
525 rpm. LCAT was titrated from 0.4 – 2.4  $\mu$ M in triplicate. However, for some data sets (R244H,  
526 R244H + **1**, and Y51S/G71I), the 0.4  $\mu$ M point was excluded due to low signal. The appropriate  
527 control of buffer containing DMSO or **1** was used to subtract the baseline and correct for drift  
528 using FortéBio's Data Analysis 7.0. The association and dissociation curves were fit using  
529 GraphPad Prism with a two-phase model. In order to determine  $K_d$  values, the  $k_{obs}$  (from  
530 association) were determined at each concentration for the fast phase and then plotted against  
531 LCAT concentration. The slope of the line was evaluated as  $k_{on}$  using the equation  $k_{obs} =$   
532  $k_{on}[LCAT] + k_{off}$  and the resultant  $K_d = k_{off}/k_{on}$ . For statistical analysis, the  $k_{on}$ ,  $k_{off}$ , and  $K_d$  for  
533 each replicate was determined individually and the results were compared to WT using a one-  
534 way analysis of variance followed by Tukey's multiple comparisons post-test in GraphPad Prism.  
535

## 536 **DHE Acyltransferase Assay**

537 Peptide-based HDLs were used in this assay as there is no difference between peptide HDLs and  
538 ApoA-I HDLs in both HDL binding and acyltransferase assays (Manthei et al., 2017). The  
539 peptide HDLs were made using the ESP24218 peptide with the sequence  
540 PVLDFRELLNELLEALKQKLIK (Dassuex et al., 1999; Li et al., 2015) with a  
541 DPPC:POPC:DHE ratio of 47:47:6 as previously described (Manthei et al., 2017). The assay was  
542 performed in 384-well low volume black microplates (Corning 4514) with a total assay volume  
543 of 16  $\mu\text{L}$ . In each reaction, LCAT was diluted in assay buffer to 15  $\mu\text{g mL}^{-1}$  in the presence of  
544 either 1% DMSO or 10  $\mu\text{M}$  **2** with 1% DMSO. **2** was used in this assay because it has lower  
545 background fluorescence than **1**. The DHE HDLs were diluted in 1X PBS with 1 mM EDTA and  
546 5 mM  $\beta$ -mercaptoethanol. 8  $\mu\text{L}$  of the HDLs were added to the plate, and the reactions were  
547 initiated with 8  $\mu\text{L}$  of LCAT, so that LCAT was assayed at 7.5  $\mu\text{g mL}^{-1}$  with and without 5  $\mu\text{M}$   
548 compound with a range of DHE concentrations from 0 – 50  $\mu\text{M}$ . The reactions were stopped  
549 after 25 min at 37  $^{\circ}\text{C}$  with the addition of 4  $\mu\text{L}$  of stop solution (1X PBS with 1 mM EDTA, 5 U  
550  $\text{mL}^{-1}$  cholesterol oxidase (COx), and 7% Triton X100). Following the addition of stop solution,  
551 the plates were incubated for another 60 min at 37  $^{\circ}\text{C}$  to allow for the COx to react. After the  
552 plates were re-equilibrated at room temperature, fluorescence was determined on a SpectraMax  
553 plate reader with excitation at 325 nm and emission at 425 nm, with a 420 nm cutoff. Reactions  
554 without LCAT were used for background subtraction, and reactions without LCAT and stop  
555 solution lacking COx were used to generate a standard curve for DHE. Reactions were  
556 performed in triplicate with three independent experiments per LCAT variant. Data were  
557 processed via background subtraction to remove excess fluorescence that results from the higher  
558 concentrations of DHE. These values were divided by the slope of the line from the standard

559 curve, which yields the amount of DHE-ester that resulted in each well, and then by time to  
560 determine the rate. Outliers were removed using automatic outlier elimination within Prism. For  
561 statistical analysis, the  $V_{\max}$  for each variant was compared to WT using a one-way analysis of  
562 variance followed by Tukey's multiple comparisons post-test in GraphPad Prism.

563  
564 To determine  $EC_{50}$  values, **2** was titrated from 0.004–10  $\mu\text{M}$ , and the DHE concentration was set  
565 at 50  $\mu\text{M}$ . LCAT was diluted in assay buffer and compound **2** dilutions were made with assay  
566 buffer containing 5.3% DMSO. 1.5  $\mu\text{L}$  compound was added, then 6.5  $\mu\text{L}$  LCAT, followed by 8  
567  $\mu\text{L}$  DHE. Dilutions were adjusted so that LCAT was assayed at 7.5  $\mu\text{g mL}^{-1}$ , as above. All values  
568 were background subtracted to buffer with the same concentration of **2**. A standard curve was  
569 included in one experiment with DHE from 0–50  $\mu\text{M}$  in order to adjust the final fluorescence  
570 values to a rate by dividing by the slope of the line and time (25 min), as above. Outliers were  
571 removed using automatic outlier elimination within Prism. For statistical analysis, the  $EC_{50}$  for  
572 each variant was compared to WT using a one-way analysis of variance followed by Tukey's  
573 multiple comparisons post-test in GraphPad Prism.

574  
575 **Statistical Analysis**  
576 In most cases and as indicated in the methods and figure legends, statistical analysis was  
577 performed a one-way analysis of variance followed by Tukey's multiple comparisons post-test in  
578 GraphPad Prism. A paired t-test was used to compare the basal MUP hydrolysis levels. The  
579 statistical parameters, P value cutoffs, and number of replicates for each experiment are indicated  
580 in the table that corresponds to each experiment, the figure legends, and/or methods.  
581

## 582 CHEMICAL SYNTHESIS

### 583 General Methods for Chemistry

584 All air or moisture sensitive reactions were performed under positive pressure of nitrogen with  
585 oven-dried glassware. Chemical reagents and anhydrous solvents were obtained from  
586 commercial sources and used as is. Preparative purification was performed on a Waters semi-  
587 preparative HPLC. The column used was a Phenomenex Luna C18 (5 micron, 30 x 75 mm) at a  
588 flow rate of 45 mL min<sup>-1</sup>. The mobile phase consisted of acetonitrile and water (each containing  
589 0.1% trifluoroacetic acid). A gradient of 10% to 50% acetonitrile over 8 min was used during the  
590 purification. Fraction collection was triggered by UV detection (220 nm). Analytical analysis for  
591 purity was determined by two different methods denoted as Final QC Methods 1 and 2. Method  
592 1: analysis was performed on an Agilent 1290 Infinity Series HPLC with a 3 min gradient from  
593 4% to 100% acetonitrile (containing 0.05% trifluoroacetic acid) followed by 1.5 min at 100%  
594 acetonitrile with a flow rate of 0.8 mL min<sup>-1</sup>. A Phenomenex Luna C18 column (3 micron, 3 x 75  
595 mm) was used at a temperature of 50 °C. Method 2: analysis was performed on an Agilent 1260  
596 with a 7 min gradient of 4% to 100% acetonitrile (containing 0.025% trifluoroacetic acid) in  
597 water (containing 0.05% trifluoroacetic acid) over 8 min run time at a flow rate of 1 mL min<sup>-1</sup>. A  
598 Phenomenex Luna C18 column (3 micron, 3 x 75 mm) was used at a temperature of 50 °C.  
599 Purity determination was performed using an Agilent Diode Array Detector for both Method 1  
600 and Method 2. Mass determination was performed using an Agilent 6130 mass spectrometer with  
601 electrospray ionization in the positive mode. All of the analogs for assay have purity greater than  
602 95% based on both analytical methods. <sup>1</sup>H NMR spectra were recorded on Varian 400 MHz  
603 spectrometers.

604

605 The LCAT activators were synthesized as shown in the scheme in Figure 6.

606

607 **Synthesis of 4-Hydroxy-3-(piperidin-4-yl)-4-(trifluoromethyl)-4,5-dihydro-1H-pyrazolo[3,4-**  
608 **b]pyridin-6(7H)-one, HCl (5)**

609 Step 1: To a solution of tert-butyl 4-(5-amino-1H-pyrazol-3-yl)piperidine-1-carboxylate (**5a**, 799  
610 mg, 3 mmol) in acetic acid (9 ml) was added ethyl 4,4,4-trifluoro-3-oxobutanoate (1657 mg, 9.0  
611 mmol). The mixture was then heated at 60 °C for 3 h. After cooling to room temperature (RT),  
612 the mixture was diluted with EtOAc (20 mL) and was added saturated NaHCO<sub>3(aq)</sub> slowly until  
613 the pH of aqueous layer is ~ 7. The solution was extracted with EtOAc (50 mL x 3). The  
614 combined organic layer was dried (Na<sub>2</sub>SO<sub>4</sub>) and filtered. After removal of solvent, the product  
615 was purified by silica gel chromatography using 0-5% MeOH/EtOAc as the eluent to give tert-  
616 butyl 4-(4-hydroxy-6-oxo-4-(trifluoromethyl)-4,5,6,7-tetrahydro-1H-pyrazolo[3,4-b]pyridin-3-  
617 yl)piperidine-1-carboxylate (**5b**, 690 mg, 1.71 mmol, 56.9 % yield).

618

619 Step 2: To a solution of tert-butyl 4-(4-hydroxy-6-oxo-4-(trifluoromethyl)-4,5,6,7-tetrahydro-1H-  
620 pyrazolo[3,4-b]pyridin-3-yl)piperidine-1-carboxylate (**5b**, 690 mg, 1.71 mmol) in 1,4-dioxane (4  
621 ml) was added HCl (4M in dioxane, 2.6 mL, 10.2 mmol, 6 equiv) at 0 °C. The mixture was then  
622 stirred at RT for 2 h. Then, hexane (15 mL) was added. The solid was filtered, washed with  
623 hexane (3 mL x 2), and then dried in vacuo to give 4-hydroxy-3-(piperidin-4-yl)-4-  
624 (trifluoromethyl)-4,5-dihydro-1H-pyrazolo[3,4-b]pyridin-6(7H)-one, HCl (**5**, 559 mg, 1.64  
625 mmol, 96%). The material was used without further purification. LC-MS (Method 1):  $t_R = 2.14$   
626 min,  $m/z (M+H)^+ = 305$ .

627



628 **Synthesis of 7-Hydroxy-1-(piperidin-4-yl)-7-(trifluoromethyl)-6,7-dihydro-1H-imidazo[4,5-**  
629 **b]pyridin-5(4H)-one, HCl (6)**

630 Step 1: To a mixture of 4-nitro-1H-imidazole (**6a**, 3.39 g, 30.0 mmol) and K<sub>2</sub>CO<sub>3</sub> (4.2 g, 30.0  
631 mmol) was added DMF (40 ml). The mixture was stirred at 110 °C for 1 h and tert-butyl 4-  
632 ((methylsulfonyl)oxy)piperidine-1-carboxylate (5.6 g, 20 mmol) was added and stirred at 110 °C  
633 for overnight. The mixture was poured into EtOAc (200 mL)/H<sub>2</sub>O (200 mL). The aqueous layer  
634 was extracted with EtOAc (150 mL x 2). The combined organic layer was concentrated to ~ 200  
635 ml of solvent left. The organic solution was washed with H<sub>2</sub>O (200 mL x 2), dried (Na<sub>2</sub>SO<sub>4</sub>) and  
636 filtered. After removal of solvent, some solid (nitroimidazole) from crude mixture can be filtered  
637 out by trituration with 50% EtOAc/hexane. The filtrate was concentrated and purified by silica  
638 gel chromatography using 30-70-100% EtOAc/hexane as the eluent to give tert-butyl 4-(4-nitro-  
639 1H-imidazol-1-yl)piperidine-1-carboxylate (**6b**, 2.25 g, 7.59 mmol, 38.0 % yield).

640  
641 Step 2: In a 2-neck flask was placed tert-butyl 4-(4-nitro-1H-imidazol-1-yl)piperidine-1-  
642 carboxylate (**6b**, 2.4 g, 8 mmol) and Pd-C (0.43 g, 0.40 mmol). Then, EtOH (50 ml) was added.  
643 The air was removed by house vacuum and refilled with N<sub>2</sub> for 2 times. Then, a H<sub>2</sub> balloon was  
644 attached. The N<sub>2</sub> air was removed by house vacuum and refilled with H<sub>2</sub> for 3 times. The mixture  
645 was stirred at RT for 2.5 h. The H<sub>2</sub> balloon was removed and refilled with N<sub>2</sub>. The mixture was  
646 filtered to remove most of Pd and the filtrate was then filtered again through a nylon 0.45 μM  
647 filter using EtOH as the eluent. The filtrate was concentrated to move most of EtOH until ~ 2-3  
648 mL left. Then, to the crude product was added EtOH (6 mL), acetic acid (12 ml), and then ethyl  
649 4,4,4-trifluoro-3-oxobutanoate (3.51 ml, 24.0 mmol). The mixture was then stirred at 65-70 °C  
650 for 2.5 h. After cooling to RT, the mixture was diluted with EtOAc (50 mL)/H<sub>2</sub>O (30 mL) and

651 was added saturated  $\text{NaHCO}_3(\text{aq})$  slowly until the pH of aqueous layer is  $\sim 7$ . The solution was  
652 extracted with EtOAc (70 mL x 3). The combined organic layer was dried ( $\text{Na}_2\text{SO}_4$ ) and filtered.  
653 After removal of solvent, the product was purified by silica gel chromatography using 0-5-10%  
654 MeOH/EtOAc as the eluent to give tert-butyl 4-(7-hydroxy-5-oxo-7-(trifluoromethyl)-4,5,6,7-  
655 tetrahydro-1H-imidazo[4,5-b]pyridin-1-yl)piperidine-1-carboxylate (**6c**, 2.78 g, 6.87 mmol, 86 %  
656 yield). LC-MS (Method 1):  $t_{\text{R}} = 2.14$  min,  $m/z$  ( $\text{M}+\text{H}$ )<sup>+</sup> = 405.

657  
658 Step 3: To a solution of tert-butyl 4-(7-hydroxy-5-oxo-7-(trifluoromethyl)-4,5,6,7-tetrahydro-1H-  
659 imidazo[4,5-b]pyridin-1-yl)piperidine-1-carboxylate (**6c**, 222 mg, 0.549 mmol) in 1,4-dioxane (2  
660 ml) was added HCl (4M in dioxane, 1.1 mL, 4.39 mmol, 8 equiv) at 0 °C. The mixture was then  
661 stirred at RT for 2 h. Then, hexane (15 mL) was added, stirred, and then the hexane solvent was  
662 carefully removed (3 times). The solid was then dried in vacuo to give 7-hydroxy-1-(piperidin-4-  
663 yl)-7-(trifluoromethyl)-6,7-dihydro-1H-imidazo[4,5-b]pyridin-5(4H)-one, HCl (**6**, 180 mg, 0.528  
664 mmol, 96 % yield). The material was used without further purification. LC-MS (Method 1):  $t_{\text{R}} =$   
665 2.07 min,  $m/z$  ( $\text{M}+\text{H}$ )<sup>+</sup> = 305.

666  
667 **Synthesis of 4-Hydroxy-3-(piperidin-4-yl)-4-(trifluoromethyl)-4,5-dihydroisoxazolo[5,4-**  
668 **b]pyridin-6(7H)-one, HCl (7)**

669 Step 1: To a mixture of tert-butyl 4-(2-cyanoacetyl)piperidine-1-carboxylate (**7a**, 2.02 g, 8  
670 mmol) and hydroxylamine, HCl (0.70 g, 10.0 mmol) in  $\text{CH}_2\text{Cl}_2$  (20 ml) was added  $\text{Et}_3\text{N}$  (2.23  
671 ml, 16.0 mmol). The mixture was sealed and stirred at 55 °C for overnight. After cooling to RT,  
672 the mixture was poured into  $\text{CH}_2\text{Cl}_2/\text{H}_2\text{O}$  (30 mL/30 mL). The aqueous layer was extracted with  
673  $\text{CH}_2\text{Cl}_2$  (30 mL). The combined organic layer was dried ( $\text{Na}_2\text{SO}_4$ ) and filtered. After removal of

674 solvent, the product was purified by silica gel chromatography using 60-100% EtOAc/hexane as  
675 the eluent to give tert-butyl 4-(5-aminoisoxazol-3-yl)piperidine-1-carboxylate (**7b**, 1.89 g, 7.08  
676 mmol, 88 % yield) <sup>1</sup>H NMR (400 MHz, DMSO-*d*<sub>6</sub>) δ 6.47 (s, 2H), 4.81 (s, 1H), 3.91 (d, *J* = 13.1  
677 Hz, 2H), 2.79 br (s, 2H), 2.61 (tt, *J* = 11.5, 3.7 Hz, 1H), 1.80 - 1.69 (m, 2H), 1.43-1.33 (m, 11H);  
678 LC-MS (Method 1): *t*<sub>R</sub> = 3.05 min, *m/z* (M+Na)<sup>+</sup> = 290.

679  
680 Step 2: To a solution of tert-butyl 4-(5-aminoisoxazol-3-yl)piperidine-1-carboxylate (**7b**, 535  
681 mg, 2 mmol) in EtOH (2 ml) and AcOH (4 ml) was added ethyl 4,4,4-trifluoro-3-oxobutanoate  
682 (1105 mg, 6.0 mmol). The tube was sealed and heated at 70 °C for 6 h. The mixture was diluted  
683 with EtOAc/H<sub>2</sub>O (10 mL/10 ml). Then, saturated NaHCO<sub>3(aq)</sub> was added dropwise to the stirring  
684 mixture until the pH of aqueous layer was ~ 7. The aqueous layer was extracted with EtOAc (30  
685 mL x 2). The combined organic layer was dried (Na<sub>2</sub>SO<sub>4</sub>) and filtered. After removal of solvent,  
686 the product was purified by silica gel chromatography using 20-70% EtOAc/hexane as the eluent  
687 to give tert-butyl 4-(4-hydroxy-6-oxo-4-(trifluoromethyl)-4,5,6,7-tetrahydroisoxazolo[5,4-  
688 b]pyridin-3-yl)piperidine-1-carboxylate (**7c**, 520 mg, 1.28 mmol, 64.1 % yield). <sup>1</sup>H NMR (400  
689 MHz, DMSO-*d*<sub>6</sub>) δ 11.96 (s, 1H), 7.15 (s, 1H), 4.07 – 3.78 (m, 2H), 3.10 (d, *J* = 16.0 Hz, 1H),  
690 2.97 (ddd, *J* = 11.5, 8.0, 3.6 Hz, 1H), 2.84 (d, *J* = 16.8 Hz, 1H), 2.78 (br s, 2H), 2.00 (d, *J* = 12.8  
691 Hz, 1H), 1.77 (ddd, *J* = 13.4, 3.9, 1.9 Hz, 1H), 1.66 – 1.50 (m, 1H), 1.46 – 1.40 (m, 1H), 1.38 (s,  
692 9H).

693  
694 Step 3: To a solution of tert-butyl 4-(4-hydroxy-6-oxo-4-(trifluoromethyl)-4,5,6,7-  
695 tetrahydroisoxazolo[5,4-b]pyridin-3-yl)piperidine-1-carboxylate (**7c**, 520 mg, 1.28 mmol) in  
696 CH<sub>2</sub>Cl<sub>2</sub> (5 ml) was added HCl (4M in dioxane, 10.3 mmol, 2.56 mL, ca. 8 equiv). The mixture

697 was stirred at RT for 2 h. Then, hexane (15 mL) was added, stirred, and then the hexane solvent  
698 was carefully removed (3 times). The solid was then dried in vacuo to give 4-hydroxy-3-  
699 (piperidin-4-yl)-4-(trifluoromethyl)-4,5-dihydroisoxazolo[5,4-b]pyridin-6(7H)-one, HCl (**7**, 366  
700 mg, 1.07 mmol, 83 % yield). The product was used without further purification. LC-MS (Method  
701 1):  $t_R = 2.28$  min,  $m/z$  (M+H)<sup>+</sup> = 306.

702  
703 **Synthesis of 6-(4-(4-Hydroxy-6-oxo-4-(trifluoromethyl)-4,5,6,7-tetrahydro-1H-pyrazolo[3,4-**  
704 **b]pyridin-3-yl)piperidin-1-yl)-4-(trifluoromethyl)nicotinonitrile, TFA (**1**)**

705 To a solution of 4-hydroxy-3-(piperidin-4-yl)-4-(trifluoromethyl)-4,5-dihydro-1H-pyrazolo[3,4-  
706 b]pyridin-6(7H)-one, HCl (**5**, 34.1 mg, 0.1 mmol) in EtOH (2 mL) was added 6-chloro-4-  
707 (trifluoromethyl)nicotinonitrile (41.3 mg, 0.20 mmol) and Et<sub>3</sub>N (0.042 mL, 0.30 mmol). The  
708 mixture was stirred at RT for 1 h and then concentrated to remove most of EtOH. The mixture  
709 was dissolved in DMF, filtered through a filter and then submitted for purification by semi-  
710 preparative HPLC to give 6-(4-(4-hydroxy-6-oxo-4-(trifluoromethyl)-4,5,6,7-tetrahydro-1H-  
711 pyrazolo[3,4-b]pyridin-3-yl)piperidin-1-yl)-4-(trifluoromethyl)nicotinonitrile, TFA (**1**, 7.7 mg,  
712 0.013 mmol, 13.1 % yield). <sup>1</sup>H NMR (400 MHz, DMSO-*d*<sub>6</sub>)  $\delta$  12.14 (s, 1H), 10.46 (s, 1H), 8.69  
713 (s, 1H), 7.29 (s, 1H), 6.72 (s, 1H), 4.68 (s, 2H), 3.40 – 3.29 (m, 1H), 3.05 (t,  $J = 12.9$  Hz, 2H),  
714 2.87 (d,  $J = 16.7$  Hz, 1H), 2.70 (d,  $J = 16.5$  Hz, 1H), 1.91 (d,  $J = 11.7$  Hz, 1H), 1.73 (d,  $J = 5.2$   
715 Hz, 2H), 1.64 (qd,  $J = 12.5, 3.8$  Hz, 1H); LC-MS (Method 2):  $t_R = 4.70$  min,  $m/z$  (M+H)<sup>+</sup> = 475.

716

717

718

719 **Synthesis of 4-Hydroxy-4-(trifluoromethyl)-3-(1-(5-(trifluoromethyl)pyrazin-2-yl)piperidin-**  
720 **4-yl)-4,5-dihydro-1H-pyrazolo[3,4-b]pyridin-6(7H)-one (2)**

721 To a solution of 4-hydroxy-3-(piperidin-4-yl)-4-(trifluoromethyl)-4,5-dihydro-1H-pyrazolo[3,4-  
722 b]pyridin-6(7H)-one, HCl (**5**, 153 mg, 0.45 mmol) in DMSO (2 mL) was added 2-chloro-5-  
723 (trifluoromethyl)pyrazine (123 mg, 0.675 mmol) and then Hunig's base (0.16 mL, 0.90 mmol).  
724 The mixture was stirred at RT for 3 h. The mixture was diluted with EtOAc (30 mL), washed  
725 with H<sub>2</sub>O (30 mL x 2), dried (Na<sub>2</sub>SO<sub>4</sub>) and filtered. After removal of solvent, the product was  
726 purified by silica gel chromatography using 45-85% EtOAc/hexane as the eluent to give 4-  
727 hydroxy-4-(trifluoromethyl)-3-(1-(5-(trifluoromethyl)pyrazin-2-yl)piperidin-4-yl)-4,5-dihydro-  
728 1H-pyrazolo[3,4-b]pyridin-6(7H)-one (**2**, 155 mg, 0.344 mmol, 76 % yield) as a white solid. <sup>1</sup>H  
729 NMR (400 MHz, DMSO-*d*<sub>6</sub>) δ 12.15 (s, 1H), 10.46 (s, 1H), 8.48 – 8.46 (m, 2H), 6.72 (s, 1H),  
730 4.62 – 4.58 (m, 2H), 3.38 – 3.31 (m, 1H), 3.08 – 2.96 (m, 2H), 2.87 (d, *J* = 16.6 Hz, 1H), 2.70 (d,  
731 *J* = 16.6 Hz, 1H), 1.96 – 1.84 (m, 1H), 1.76-1.62 (m, 3H); LC-MS (Method 2): *t*<sub>R</sub> = 4.70 min,  
732 *m/z* (M+H)<sup>+</sup> = 451.

733  
734 **Synthesis of 7-Hydroxy-7-(trifluoromethyl)-1-(1-(5-(trifluoromethyl)pyrazin-2-yl)piperidin-**  
735 **4-yl)-6,7-dihydro-1H-imidazo[4,5-b]pyridin-5(4H)-one (3) and 7-(trifluoromethyl)-1-(1-(5-**  
736 **(trifluoromethyl)pyrazin-2-yl)piperidin-4-yl)-1H-imidazo[4,5-b]pyridin-5(4H)-one (8)**

737 To a solution of 7-hydroxy-1-(piperidin-4-yl)-7-(trifluoromethyl)-6,7-dihydro-1H-imidazo[4,5-  
738 b]pyridin-5(4H)-one, TFA (**6**, 586 mg, 1.4 mmol) in DMSO (2 mL) was added 2-chloro-5-  
739 (trifluoromethyl)pyrazine (511 mg, 2.80 mmol) and then Hunig's base (0.489 mL, 2.80 mmol).  
740 The mixture was stirred at RT for 3 h. The mixture was diluted with EtOAc (30 mL), washed  
741 with H<sub>2</sub>O (30 mL x 2), dried (Na<sub>2</sub>SO<sub>4</sub>) and filtered. After removal of solvent, to the crude

742 product was added CH<sub>2</sub>Cl<sub>2</sub> (10 mL). The product was filtered and washed with CH<sub>2</sub>Cl<sub>2</sub> (2 mL x  
743 3) and dried to give product (315 mg). The filtrate containing some desired product was  
744 concentrated and purified by silica gel chromatography using 5-10% MeOH/CH<sub>2</sub>Cl<sub>2</sub> to give 163  
745 mg of product. Total, 478 mg of product was obtained. 7-hydroxy-7-(trifluoromethyl)-1-(1-(5-  
746 (trifluoromethyl)pyrazin-2-yl)piperidin-4-yl)-6,7-dihydro-1H-imidazo[4,5-b]pyridin-5(4H)-one  
747 (**3**, 478 mg, 1.061 mmol, 76 % yield) <sup>1</sup>H NMR (400 MHz, DMSO-*d*<sub>6</sub>) δ 10.27 (s, 1H), 8.48 (m,  
748 2H), 7.75 (s, 1H), 7.22 (s, 1H), 4.75 – 4.54 (m, 3H), 3.13 – 2.96 (m, 3H), 2.76 (d, *J* = 16 Hz,  
749 1H), 2.15 (d, *J* = 12.3 Hz, 1H), 2.06 (qd, *J* = 12.4, 4.0 Hz, 1H), 1.93 (d, *J* = 12.0 Hz, 1H), 1.77  
750 (qd, *J* = 12.3, 4.1 Hz, 1H); LC-MS (Method 2): *t*<sub>R</sub> = 4.71 min, *m/z* (M+H)<sup>+</sup> = 451. Some  
751 elimination side product was also collected and re-purified by silica gel chromatography using 0-  
752 5-10% MeOH/CH<sub>2</sub>Cl<sub>2</sub> as the eluent to give 7-(trifluoromethyl)-1-(1-(5-(trifluoromethyl)pyrazin-  
753 2-yl)piperidin-4-yl)-1H-imidazo[4,5-b]pyridin-5(4H)-one (**8**, 40 mg, 0.093 mmol, 6.6%). <sup>1</sup>H  
754 NMR (400 MHz, DMSO-*d*<sub>6</sub>) δ 11.89 (br s, 1H), 8.57 (s, 1H), 8.54 – 8.48 (m, 2H), 6.75 (s, 1H),  
755 4.71 (d, *J* = 13.4 Hz, 2H), 4.46 (q, *J* = 7.3, 6.9 Hz, 1H), 3.12 (dt, *J* = 14.3, 8.4 Hz, 2H), 2.16 –  
756 1.95 (m, 4H); LC-MS (Method 2): *t*<sub>R</sub> = 5.02 min, *m/z* (M+H)<sup>+</sup> = 433.

757

758 **Synthesis of 4-hydroxy-4-(trifluoromethyl)-3-(1-(5-(trifluoromethyl)pyrazin-2-yl)piperidin-**  
759 **4-yl)-4,5-dihydroisoxazolo[5,4-b]pyridin-6(7H)-one (9)**

760 To a solution of 4-hydroxy-3-(piperidin-4-yl)-4-(trifluoromethyl)-4,5-dihydroisoxazolo[5,4-  
761 b]pyridin-6(7H)-one, TFA (**7**, 84 mg, 0.2 mmol) in DMF (1 mL) was added 2-chloro-5-  
762 (trifluoromethyl)pyrazine (73.0 mg, 0.40 mmol) and Et<sub>3</sub>N (0.084 mL, 0.60 mmol). The mixture  
763 was stirred at RT for 3 h. The mixture was dropped into a vigorously stirred H<sub>2</sub>O (40 mL). The  
764 solid was filtered, washed with H<sub>2</sub>O (2 x 3 mL) and then dried to give ~ 95 mg of desired

765 product, which is ca. 90-95% purity. The product was dissolved in CH<sub>2</sub>Cl<sub>2</sub> and purified by silica  
766 gel chromatography using 35-70% EtOAc/hexane as the eluent to give 4-hydroxy-4-  
767 (trifluoromethyl)-3-(1-(5-(trifluoromethyl)pyrazin-2-yl)piperidin-4-yl)-4,5-dihydroisoxazolo[5,4-  
768 b]pyridin-6(7H)-one (**9**, 42 mg, 0.093 mmol, 46.5 % yield). <sup>1</sup>H NMR (400 MHz, DMSO-*d*<sub>6</sub>) δ  
769 11.99 (s, 1H), 8.51 – 8.32 (m, 2H), 7.21 (s, 1H), 4.50 (dd, *J* = 15.5, 12.0 Hz, 2H), 3.23 – 3.05 (m,  
770 4H), 2.86 (d, *J* = 16.8 Hz, 1H), 2.16 (d, *J* = 12.7 Hz, 1H), 1.92 (d, *J* = 12.3 Hz, 1H), 1.82 – 1.66  
771 (m, 1H), 1.63 – 1.48 (m, 1H); LC-MS (Method 2): *t*<sub>R</sub> = 5.16 min, *m/z* (M+H)<sup>+</sup> = 452.

772

### 773 **Data Availability**

774 The atomic coordinates and structure factors for crystals of the ΔNΔC-IDFP-1 complex have  
775 been deposited in the PDB with accession code 6DTJ.

776

### 777 **Competing Interests**

778 The authors declare that they have no competing interests.

779

### 780 **Acknowledgements**

781 We thank D. J. Leahy (Johns Hopkins University School of Medicine) for the expression vector  
782 pProEX HT-EndoH. We also thank the members of the Tesmer lab for their critique of the  
783 manuscript.

784 **REFERENCES**

- 785 MedImmune. A Study to Evaluate the Safety and Efficacy of MEDI6012 in Acute ST Elevation  
786 Myocardial Infarction (REAL-TIMI 63B). Available from:  
787 <https://clinicaltrials.gov/ct2/show/NCT03578809>. NLM identifier: NCT03578809.
- 788 MedImmune. To Evaluate Safety, Pharmacokinetics and Pharmacodynamics of MEDI6012 in  
789 Subjects With Stable Coronary Artery Disease. Available from:  
790 <https://clinicaltrials.gov/ct2/show/NCT02601560>. NLM identifier: NCT02601560.
- 791 Adams, P.D., Afonine, P.V., Bunkóczi, G., Chen, V.B., Davis, I.W., Echols, N., Headd, J.J.,  
792 Hung, L.W., Kapral, G.J., Grosse-Kunstleve, R.W., McCoy, A.J., Moriarty, N.W., Oeffner, R.,  
793 Read, R.J., Richardson, D.C., Richardson, J.S., Terwilliger, T.C., and Zwart, P.H. (2010).  
794 PHENIX: a comprehensive Python-based system for macromolecular structure solution. *Acta*  
795 *Crystallographica Section D* 66, 213-221. DOI:10.1107/S0907444909052925
- 796 Ahsan, L., Ossoli, A.F., Freeman, L., Vaisman, B., Amar, M.J., Shamburek, R.D., and Remaley,  
797 A.T. (2014). Role of Lecithin: Cholesterol Acyltransferase in HDL Metabolism and  
798 Atherosclerosis. In *The HDL Handbook: Biological Functions and Clinical Implications.*, T.  
799 Komoda, ed. (Elsevier), pp. 159-194. ISBN: 978-0-12-407867-3
- 800 Calabresi, L., Simonelli, S., Gomaschi, M., and Franceschini, G. (2012). Genetic  
801 lecithin:cholesterol acyltransferase deficiency and cardiovascular disease. *Atherosclerosis* 222,  
802 299-306. DOI:10.1016/j.atherosclerosis.2011.11.034
- 803 Casteleijn, M.G., Parkkila, P., Viitala, T., and Koivuniemi, A. (2018). Interaction of  
804 lecithin:cholesterol acyltransferase with lipid surfaces and apolipoprotein A-I-derived peptides.  
805 *Journal of lipid research* 59, 670-683. DOI:10.1194/jlr.M082685
- 806 Castro-Ferreira, I., Carmo, R., Silva, S.E., Correa, O., Fernandes, S., Sampaio, S., Pedro, R.P.,  
807 Praca, A., and Oliveira, J.P. (2018). Novel Missense LCAT Gene Mutation Associated with an  
808 Atypical Phenotype of Familial LCAT Deficiency in Two Portuguese Brothers. *JIMD Rep* 40,  
809 55-62. DOI:10.1007/8904\_2017\_57
- 810 Charlton-Menys, V., Pisciotto, L., Durrington, P.N., Neary, R., Short, C.D., Calabresi, L.,  
811 Calandra, S., and Bertolini, S. (2007). Molecular characterization of two patients with severe  
812 LCAT deficiency. *Nephrology Dialysis Transplantation* 22, 2379-2382.  
813 DOI:10.1093/ndt/gfm311
- 814 Chen, V.B., Arendall, W.B., Headd, J.J., Keedy, D.A., Immormino, R.M., Kapral, G.J., Murray,  
815 L.W., Richardson, J.S., and Richardson, D.C. (2010). MolProbity: all-atom structure validation  
816 for macromolecular crystallography. *Acta Crystallographica Section D* 66, 12-21.  
817 DOI:10.1107/S0907444909042073
- 818 Chen, Z., Wang, S.-p., Krsmanovic, M.L., Castro-Perez, J., Gagen, K., Mendoza, V., Rosa, R.,  
819 Shah, V., He, T., Stout, S.J., Geoghagen, N.S., Lee, S.H., McLaren, D.G., Wang, L., Roddy,  
820 T.P., Plump, A.S., Hubbard, B.K., Sinz, C.J., and Johns, D.G. (2012). Small molecule activation



- 821 of lecithin cholesterol acyltransferase modulates lipoprotein metabolism in mice and hamsters.  
822 *Metabolism* 61, 470-481. DOI:10.1016/j.metabol.2011.08.006
- 823 Cooke, A.L., Morris, J., Melchior, J.T., Street, S.E., Jerome, W.G., Huang, R., Herr, A.B., Smith,  
824 L.E., Segrest, J.P., Remaley, A.T., Shah, A.S., Thompson, T.B., and Davidson, W.S. (2018). A  
825 thumbwheel mechanism for APOA1 activation of LCAT activity in HDL. *Journal of lipid*  
826 *research* 59, 1244-1255. DOI:10.1194/jlr.M085332
- 827 Czarnecka, H., and Yokoyama, S. (1996). Regulation of cellular cholesterol efflux by  
828 lecithin:cholesterol acyltransferase reaction through nonspecific lipid exchange. *Journal of*  
829 *Biological Chemistry* 271, 2023-2028. DOI:10.1074/jbc.271.4.2023
- 830 J.-L. Dassuex, R. Sekul, K. Buttner, I. Cornut, G. Metz, and J. Dufourcq (1999). Apolipoprotein  
831 A-I agonists and their use to treat dyslipidemic disorders. *US Patent No. 6,004,925*.
- 832 Emsley, P., Lohkamp, B., Scott, W.G., and Cowtan, K. (2010). Features and development of  
833 Coot. *Acta Crystallographica Section D* 66, 486-501. DOI:10.1107/S0907444910007493
- 834 Fielding, C.J., Shore, V.G., and Fielding, P.E. (1972). A protein cofactor of lecithin:cholesterol  
835 acyltransferase. *Biochemical and Biophysical Research Communications* 46, 1493-1498.  
836 DOI:10.1016/0006-291X(72)90776-0
- 837 Freeman, L.A., Demosky, S.J., Jr., Konaklieva, M., Kuskovsky, R., Aponte, A., Ossoli, A.F.,  
838 Gordon, S.M., Koby, R.F., Manthei, K.A., Shen, M., Vaisman, B.L., Shamburek, R.D., Jadhav,  
839 A., Calabresi, L., Gucek, M., Tesmer, J.J.G., Levine, R.L., and Remaley, A.T. (2017).  
840 Lecithin:Cholesterol Acyltransferase Activation by Sulfhydryl-Reactive Small Molecules: Role  
841 of Cysteine-31. *Journal of pharmacology and experimental therapeutics* 362, 306-318.  
842 DOI:10.1124/jpet.117.240457
- 843 Glomset, J.A. (1968). The plasma lecithins:cholesterol acyltransferase reaction. *Journal of lipid*  
844 *research* 9, 155-167.
- 845 Glukhova, A., Hinkovska-Galcheva, V., Kelly, R., Abe, A., Shayman, J.A., and Tesmer, J.J.  
846 (2015). Structure and function of lysosomal phospholipase A2 and lecithin:cholesterol  
847 acyltransferase. *Nat Commun* 6, 6250. DOI:10.1038/ncomms7250
- 848 Gunawardane, R.N., Fordstrom, P., Piper, D.E., Masterman, S., Siu, S., Liu, D., Brown, M., Lu,  
849 M., Tang, J., Zhang, R., Cheng, J., Gates, A., Meininger, D., Chan, J., Carlson, T., Walker, N.,  
850 Schwarz, M., Delaney, J., and Zhou, M. (2016). Agonistic Human Antibodies Binding to  
851 Lecithin-Cholesterol Acyltransferase Modulate High Density Lipoprotein Metabolism. *Journal*  
852 *of Biological Chemistry* 291, 2799-2811. DOI:10.1074/jbc.M115.672790
- 853 Hayward, S., and Berendsen, H.J. (1998). Systematic analysis of domain motions in proteins  
854 from conformational change: new results on citrate synthase and T4 lysozyme. *Proteins* 30, 144-  
855 154. DOI:10.1002/(SICI)1097-0134(19980201)30:2<144::AID-PROT4>3.0.CO;2-N

- 856 Ho, B.K., and Gruswitz, F. (2008). HOLLOW: generating accurate representations of channel  
857 and interior surfaces in molecular structures. *BMC Struct Biol* 8, 49. DOI:10.1186/1472-6807-8-  
858 49
- 859 Hörl, G., Kroisel, P.M., Wagner, E., Tiran, B., Petek, E., and Steyrer, E. (2006). Compound  
860 heterozygosity (G71R/R140H) in the lecithin:cholesterol acyltransferase (LCAT) gene results in  
861 an intermediate phenotype between LCAT-deficiency and fish-eye disease. *Atherosclerosis* 187,  
862 101-109. DOI:10.1016/j.atherosclerosis.2005.08.038
- 863 Jonas, A. (2000). Lecithin cholesterol acyltransferase. *Biochimica et Biophysica Acta*.  
864 DOI:10.1016/S1388-1981(00)00153-0
- 865 F. Kayser, M. Labelle, B. Shan, J. Zhang, and M. Zhou (2013). Methods for treating  
866 atherosclerosis. *US Patent No. 8,426,358 B2*.
- 867 Kingwell, B.A., Chapman, M.J., Kontush, A., and Miller, N.E. (2014). HDL-targeted therapies:  
868 progress, failures and future. *Nature Reviews Drug Discovery* 13, 445-464.  
869 DOI:10.1038/nrd4279
- 870 H. Kobayashi, M. Arai, T. Kaneko, and N. Terasaka (2016). 5-hydroxy-4-  
871 (trifluoromethyl)pyrazolopyridine derivative. *US Patent No. 9,796,709 B2*.
- 872 H. Kobayashi, N. Ohkawa, M. Takano, H. Kubota, T. Onoda, T. Kaneko, M. Arai, and N.  
873 Terasaka (2015a). Piperidinylpyrazolopyridine derivative. *US Patent No. 9,150,575 B2*.
- 874 H. Kobayashi, T. Onoda, T. Kaneko, and K. Ishibashi (2015b). Condensed Pyrazole Derivative.  
875 *WO Patent No. 2015111545*.
- 876 Krissinel, E., and Henrick, K. (2004). Secondary-structure matching (SSM), a new tool for fast  
877 protein structure alignment in three dimensions. *Acta Crystallographica Section D* 60, 2256-  
878 2268. DOI:10.1107/S09074444904026460
- 879 Kuivenhoven, J.A., Pritchard, H., Hill, J., Frohlich, J., Assmann, G., and Kastelein, J. (1997).  
880 The molecular pathology of lecithin:cholesterol acyltransferase (LCAT) deficiency syndromes.  
881 *Journal of lipid research* 38, 191-205.
- 882 Laskowski, R.A., and Swindells, M.B. (2011). LigPlot+: multiple ligand-protein interaction  
883 diagrams for drug discovery. *Journal of Chemical Information and Modeling* 51, 2778-2786.  
884 DOI:10.1021/ci200227u
- 885 Li, D., Gordon, S., and Schwendeman, A. (2015). Apolipoprotein Mimetic Peptides for  
886 Stimulating Cholesterol Efflux. In *Apolipoprotein Mimetics in the Management of Human*  
887 *Disease*, G.M. Anantharamaiah, and D. Goldberg, eds. (New York: Springer International  
888 Publishing), pp. 29-42. ISBN: 9783319173504
- 889 Manthei, K.A., Ahn, J., Glukhova, A., Yuan, W., Larkin, C., Manett, T.D., Chang, L., Shayman,  
890 J.A., Axley, M.J., Schwendeman, A., and Tesmer, J.J.G. (2017). A retractable lid in  
891 lecithin:cholesterol acyltransferase provides a structural mechanism for activation by

- 892 apolipoprotein A-I. *Journal of Biological Chemistry* 292, 20313-20327.  
893 DOI:10.1074/jbc.M117.802736
- 894 McCoy, A.J., McCoy, McCoy, A.J., and A.J. (2007). Solving structures of protein complexes by  
895 molecular replacement with Phaser. *Acta Crystallographica Section D* 63, 32-41.  
896 DOI:10.1107/S0907444906045975
- 897 McLean, J.W. (1992). Molecular Defects in the Lecithin:Cholesterol Acyltransferase Gene. In  
898 High density lipoproteins and atherosclerosis III: proceedings of the 3rd International  
899 Symposium on Plasma High Density Lipoproteins and Atherosclerosis, N.E. Miller, and A.R.  
900 Tall, eds. (San Antonio, Elsevier Science Publishers), pp. 59-65.
- 901 Murshudov, G.N., Skubák, P., Lebedev, A.A., Pannu, N.S., Steiner, R.A., Nicholls, R.A., Winn,  
902 M.D., Long, F., and Vagin, A.A. (2011). REFMAC5 for the refinement of macromolecular  
903 crystal structures. *Acta Crystallographica Section D* 67, 355-367.  
904 DOI:10.1107/S0907444911001314
- 905 T. Onoda, T. Kaneko, M. Arai, H. Kobayashi, and N. Terasaka (2015). Imidazopyridine  
906 Derivative. *WO Patent No. 2015087996*.
- 907 Ossoli, A., Neufeld, E.B., Thacker, S.G., Vaisman, B., Pryor, M., Freeman, L.A., Brantner, C.A.,  
908 Baranova, I., Francone, N.O., Demosky, S.J., Jr., Vitali, C., Locatelli, M., Abbate, M., Zoja, C.,  
909 Franceschini, G., Calabresi, L., and Remaley, A.T. (2016). Lipoprotein X Causes Renal Disease  
910 in LCAT Deficiency. *PloS ONE* 11, e0150083. DOI:10.1371/journal.pone.0150083
- 911 Otwinowski, Z., and Minor, W. (1997). Processing of X-ray diffraction data collected in  
912 oscillation mode. *Methods in enzymology* 276, 307-326. DOI:10.1016/S0076-6879(97)76066-X
- 913 Pettersen, E.F., Goddard, T.D., Huang, C.C., Couch, G.S., Greenblatt, D.M., Meng, E.C., and  
914 Ferrin, T.E. (2004). UCSF Chimera - a visualization system for exploratory research and  
915 analysis. *Journal of computational chemistry* 25, 1605-1612. DOI:10.1002/jcc.20084
- 916 Piper, D.E., Romanow, W.G., Gunawardane, R.N., Fordstrom, P., Masterman, S., Pan, O.,  
917 Thibault, S.T., Zhang, R., Meiningner, D., Schwarz, M., Wang, Z., King, C., Zhou, M., and  
918 Walker, N.P. (2015). The high-resolution crystal structure of human LCAT. *Journal of lipid*  
919 *research* 56, 1711-1719. DOI:10.1194/jlr.M059873
- 920 Pisciotta, L., Calabresi, L., Lupattelli, G., Siepi, D., Mannarino, M.R., Moleri, E., Bellocchio, A.,  
921 Cantafora, A., Tarugi, P., Calandra, S., and Bertolini, S. (2005). Combined monogenic  
922 hypercholesterolemia and hypoalphalipoproteinemia caused by mutations in LDL-R and LCAT  
923 genes. *Atherosclerosis* 182, 153-159. DOI:10.1016/j.atherosclerosis.2005.01.048
- 924 Rader, D.J. (2016). New Therapeutic Approaches to the Treatment of Dyslipidemia. *Cell*  
925 *Metabolism* 23, 405-412. DOI:10.1016/j.cmet.2016.01.005
- 926 Rousset, X., Shamburek, R., Vaisman, B., Amar, M., and Remaley, A.T. (2011). Lecithin  
927 cholesterol acyltransferase: an anti- or pro-atherogenic factor? *Curr Atheroscler Rep* 13, 249-  
928 256. DOI:10.1007/s11883-011-0171-6

- 929 Rousset, X., Vaisman, B., Amar, M., Sethi, A.A., and Remaley, A.T. (2009). Lecithin:  
930 cholesterol acyltransferase--from biochemistry to role in cardiovascular disease. *Current Opinion*  
931 *in Endocrinology, Diabetes and Obesity* *16*, 163-171.
- 932 Sampaio, C.T., Maranhao, R., Guerra, A.A., Braga, R.M., Santo, R.M., Testagrossa, L.A., Reis,  
933 M.A., Silva, J.A., Carrascossi, H., Onuchic, L.F., Balbo, B.E., Saraiva, L.C., Nakano, H.R.,  
934 Amaral, A.G., Costa, E., Watanabe, E.H., Neves, P.D., and Chacra, A.P. (2017). Comprehensive  
935 Analysis of the Renal and Systemic Phenotypes Associated with Familial Deficiency of Lecithin-  
936 Cholesterol Acyltransferase: a Case Series. In *American Society of Nephrology - Kidney Week*  
937 (New Orleans, LA).
- 938 Shamburek, R.D., Bakker-Arkema, R., Auerbach, B.J., Krause, B.R., Homan, R., Amar, M.J.,  
939 Freeman, L.A., and Remaley, A.T. (2016a). Familial lecithin:cholesterol acyltransferase  
940 deficiency: First-in-human treatment with enzyme replacement. *Journal of clinical lipidology* *10*,  
941 356-367. DOI:10.1016/j.jacl.2015.12.007
- 942 Shamburek, R.D., Bakker-Arkema, R., Shamburek, A.M., Freeman, L.A., Amar, M.J., Auerbach,  
943 B., Krause, B.R., Homan, R., Adelman, S.J., Collins, H.L., Sampson, M., Wolska, A., and  
944 Remaley, A.T. (2016b). Safety and Tolerability of ACP-501, a Recombinant Human  
945 Lecithin:Cholesterol Acyltransferase, in a Phase 1 Single-Dose Escalation Study. *Circulation*  
946 *research* *118*, 73-82. DOI:10.1161/CIRCRESAHA.115.306223
- 947 Strom, E.H., Sund, S., Reier-Nilsen, M., Dorje, C., and Leren, T.P. (2011). Lecithin: Cholesterol  
948 Acyltransferase (LCAT) Deficiency: renal lesions with early graft recurrence. *Ultrastructural*  
949 *Pathology* *35*, 139-145. DOI:10.3109/01913123.2010.551578
- 950 Vrabec, M.P., Shapiro, M.B., Koller, E., Wiebe, D.A., Henricks, J., and Albers, J.J. (1988).  
951 Ophthalmic observations in lecithin cholesterol acyltransferase deficiency. *JAMA*  
952 *Ophthalmology* *106*, 225-229. DOI:10.1001/archopht.1988.01060130235035
- 953
- 954

955 **Table 1. EC<sub>50</sub> values of LCAT variants in esterase and acyltransferase assays**  
 956

| Variant/Cmpd | MUP assay EC <sub>50</sub> (μM) |             |             | DHE assay EC <sub>50</sub> (μM) |
|--------------|---------------------------------|-------------|-------------|---------------------------------|
|              | 1                               | 2           | 3           | 2                               |
| WT           | 0.16 ± 0.01                     | 0.28 ± 0.04 | 0.32 ± 0.05 | 0.28 ± 0.09                     |
| Y51S         | 0.59 ± 0.03                     | 0.74 ± 0.2  | 1.6 ± 0.4   | ND                              |
| G71I         | > 5                             | > 5         | > 5         | ND                              |
| Y51S/G71I    | no effect                       | no effect   | no effect   | no effect                       |
| R244A        | 0.13 ± 0.02                     | 0.27 ± 0.04 | 0.40 ± 0.03 | 0.76 ± 0.2                      |
| R244H        | 0.16 ± 0.03                     | 0.32 ± 0.03 | 0.47 ± 0.05 | 4.6 ± 2                         |

957 ND = not determined. In the MUP esterase assay, compound was titrated from 0.04 – 9.5 μM, and reactions were  
 958 performed in triplicate. In the DHE acyltransferase assay, **2** was titrated from 0.004 – 10 μM and reactions were  
 959 performed three times in triplicate. Values reported are mean ± s.e.m.

960 **Table 2. Fold activation for LCAT variants in the MUP esterase assay.**

961

| Variant/Cmpd | Fold activation |             |            |           |            |              |
|--------------|-----------------|-------------|------------|-----------|------------|--------------|
|              | 1               | 2           | 3          | 6         | 8          | 9            |
| WT           | 2.3 ± 0.4       | 2.3 ± 0.4   | 2.4 ± 0.4  | no effect | 3.7 ± 0.9  | 1.6 ± 0.2    |
| Y51S         | 1.9 ± 0.2       | 1.8 ± 0.1   | 1.9 ± 0.2  | no effect | 2.8 ± 0.6  | 1.1 ± 0.07   |
| G71I         | 1.5 ± 0.4       | 1.7 ± 0.2   | 1.5 ± 0.2  | no effect | 1.2 ± 0.1  | 0.96 ± 0.01  |
| Y51S/G71I    | 1.3 ± 0.3       | 0.99 ± 0.03 | 1.1 ± 0.06 | no effect | 1.1 ± 0.07 | 0.97 ± 0.003 |
| R244A        | 1.7 ± 0.4       | 1.9 ± 0.2   | 1.9 ± 0.2  | no effect | 3.2 ± 0.8  | 1.2 ± 0.1    |
| R244H        | 1.6 ± 0.3       | 1.8 ± 0.1   | 1.8 ± 0.1  | no effect | 2.8 ± 0.6  | 1.3 ± 0.06   |

962 Compound was titrated from 0.04 – 9.5 μM, and reactions were performed in triplicate with values reported as mean  
963 ± s.e.m.

964 **Table 3. Effect of LCAT mutations and compound 1 on HDL binding**  
965

| <b>Variant</b>   | <b><math>k_{\text{on}}</math> (<math>\text{s}^{-1} \mu\text{M}^{-1}</math>)</b> | <b><math>k_{\text{off}}</math> (<math>\text{s}^{-1}</math>)</b> | <b><math>K_{\text{d}}</math> (<math>\mu\text{M}</math>)</b> |
|------------------|---------------------------------------------------------------------------------|-----------------------------------------------------------------|-------------------------------------------------------------|
| WT               | 0.10 $\pm$ 0.006                                                                | 0.12 $\pm$ 0.008                                                | 1.2                                                         |
| WT + <b>1</b>    | 0.11 $\pm$ 0.003                                                                | 0.11 $\pm$ 0.004                                                | 1.0                                                         |
| Y51S/G71I        | 0.074 $\pm$ 0.02                                                                | 0.33 $\pm$ 0.03                                                 | 4.5                                                         |
| R244A            | 0.069 $\pm$ 0.003                                                               | 0.22 $\pm$ 0.005                                                | 3.2                                                         |
| R244A + <b>1</b> | 0.017 $\pm$ 0.009                                                               | 0.19 $\pm$ 0.01                                                 | 11                                                          |
| R244H            | 0.022 $\pm$ 0.002                                                               | 0.40 $\pm$ 0.004                                                | 18                                                          |
| R244H + <b>1</b> | 0.035 $\pm$ 0.005                                                               | 0.15 $\pm$ 0.007                                                | 4.3                                                         |

966 HDLs were attached to streptavidin tips via biotinylated lipid, then dipped into LCAT without or with 10  $\mu\text{M}$   
967 compound **1**. LCAT was titrated from 0.4 – 2.4  $\mu\text{M}$ ,  $k_{\text{obs}}$  was calculated for each concentration and plotted against  
968 concentration. Reactions were performed in triplicate and values are reported as mean  $\pm$  s.e.m.

969 **Table 4. Data collection and refinement statistics**

970

| <b>Data collection</b>                              | <b><math>\Delta N\Delta C</math>-IDFP-1</b> |
|-----------------------------------------------------|---------------------------------------------|
| Space group                                         | <i>C</i> 2                                  |
| Cell dimensions                                     |                                             |
| <i>a</i> , <i>b</i> , <i>c</i> (Å)                  | 134.5, 106.7, 117.8                         |
| $\alpha$ , $\beta$ , $\gamma$ (°)                   | 90.0, 125.5, 90.0                           |
| Resolution (Å)                                      | 30.0-3.10 (3.15-3.10) <sup>1</sup>          |
| <i>R</i> <sub>merge</sub>                           | 0.115 (≥1)                                  |
| <i>I</i> / $\sigma_1$                               | 11.1 (1.27)                                 |
| Completeness (%)                                    | 98.9 (100.0)                                |
| Redundancy                                          | 4.2 (4.2)                                   |
| <i>CC</i> <sub>1/2</sub>                            | (0.55)                                      |
| <b>Refinement</b>                                   |                                             |
| Resolution (Å)                                      | 28.8-3.10                                   |
| No. reflections                                     | 20,413                                      |
| <i>R</i> <sub>work</sub> / <i>R</i> <sub>free</sub> | 19.1/23.9                                   |
| No. atoms                                           | 6,197                                       |
| Protein                                             | 5,978                                       |
| Ligand                                              | 183                                         |
| Water                                               | 35                                          |
| <i>B</i> -factors                                   | 73.0                                        |
| Protein                                             | 72.6                                        |
| Ligand                                              | 91.0                                        |
| Water                                               | 38.9                                        |
| R.m.s. deviations                                   |                                             |
| Bond lengths (Å)                                    | 0.008                                       |
| Bond angles (°)                                     | 1.33                                        |
| Ramachandran statistics                             |                                             |
| Favored                                             | 93.8                                        |
| Allowed                                             | 5.1                                         |
| Outliers                                            | 1.1                                         |

971 <sup>1</sup>Values in parentheses are for the highest-resolution shell.



972 **Table 5.** EC<sub>50</sub> values of LCAT variants in the MUP esterase assay with **6**, **8**, and **9**.  
973

| Variant/Cmpd | EC <sub>50</sub> (μM) |            |           |
|--------------|-----------------------|------------|-----------|
|              | 6                     | 8          | 9         |
| WT           | no effect             | 4.6 ± 0.06 | 7.7 ± 2   |
| Y51S         | no effect             | > 10       | > 10      |
| G71I         | no effect             | > 10       | no effect |
| Y51S/G71I    | no effect             | > 10       | no effect |
| R244A        | no effect             | > 10       | 6.2 ± 0.8 |
| R244H        | no effect             | > 10       | 7.6 ± 1   |

974 Compound was titrated from 0.04 – 9.5 μM, and reactions were performed in triplicate with values reported as mean  
975 ± s.e.m.

976 **Figure 1.**

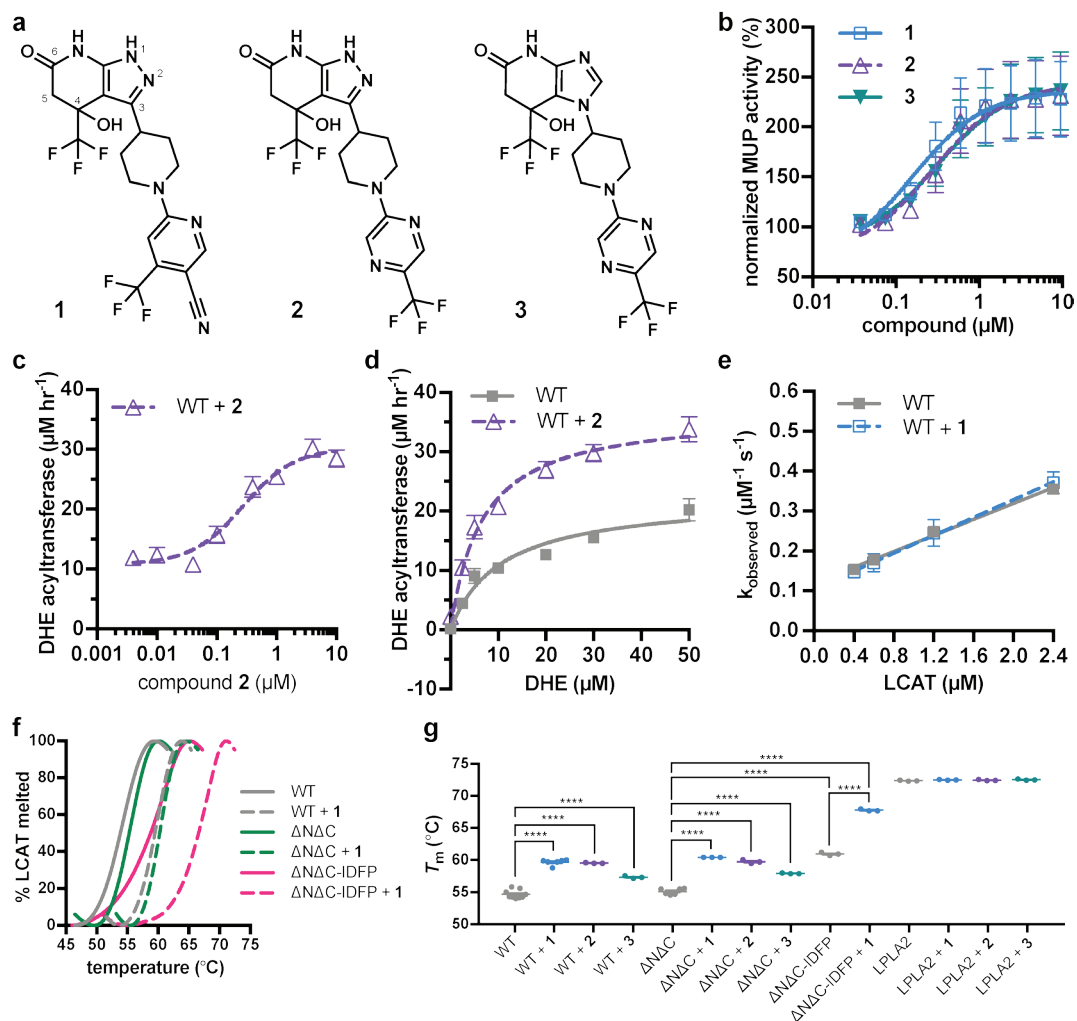

977

978 **Figure 1. Piperidinympyrazolopyridine and related activators stimulate and stabilize LCAT.** (a) Structure of  
 979 compounds **1** (patent example 95 (Kobayashi et al., 2015a)), **2** (patent example 46 (Kobayashi et al., 2015a)), and **3**  
 980 (patent example 3 (Onoda et al., 2015)). (b) All three activators stimulate LCAT in a micelle-based MUP assay.  
 981 Data shown are mean  $\pm$  s.e.m. from three independent experiments, and data were normalized to basal LCAT  
 982 activity. (c) Titration of compound **2**, used in this particular assay due to its lower background fluorescence, in the  
 983 DHE acyltransferase assay. Data shown are mean  $\pm$  s.e.m. from three independent experiments performed in  
 984 triplicate. (d) The addition of 5  $\mu$ M compound **2** stimulates LCAT acyltransferase activity. Data shown are mean  $\pm$   
 985 s.e.m. from three independent experiments performed in triplicate. (e) The addition of 10  $\mu$ M compound **1** does not  
 986 affect LCAT binding to HDL as measured with BLI. Plot used to determine  $k_{on}$ ,  $k_{off}$ , and hence  $K_d$ . Data are mean  $\pm$   
 987 s.e.m. of three independent experiments. (f) Representative DSF data highlighting the additive increase in  $T_m$   
 988 induced by combination of **1** and IDFP. Data are normalized from 0 to 100% using the lowest and highest values,  
 989 respectively. (g) Compounds **1**, **2**, and **3** stabilize WT,  $\Delta$ N $\Delta$ C, and  $\Delta$ N $\Delta$ C-IDFP LCAT, but not LPLA2. DSF data  
 990 are mean  $\pm$  s.e.m. of at least three independent experiments performed in duplicate. \*\*\*\*  $P < 0.0001$  by one-way  
 991 analysis of variance followed by Tukey's multiple comparisons post-test. Each protein without ligand was compared  
 992 to same variant with ligand, and non-significant pairs are not shown. WT compared to  $\Delta$ N $\Delta$ C was not significant.

993 **Figure 2.**

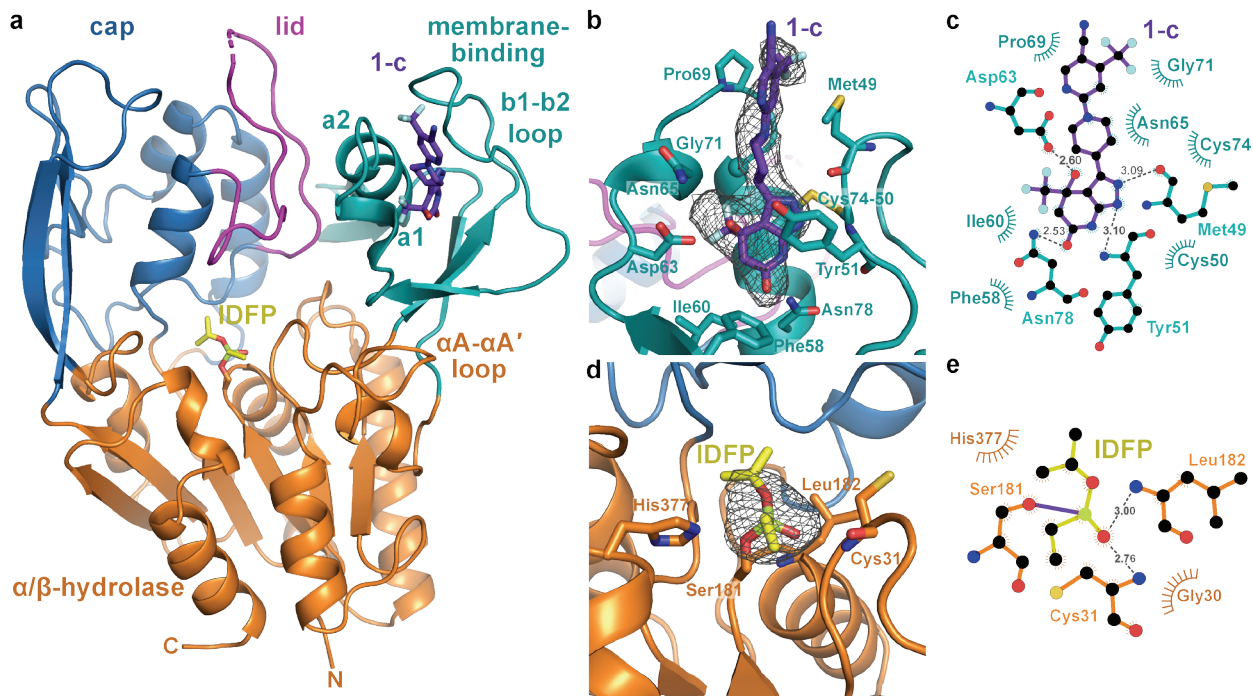

994

995 **Figure 2. Structure of the  $\Delta N\Delta C$ -IDFP·1 complex.** (a) 3.1 Å X-ray crystal structure highlighting the three  
 996 domains of LCAT and the binding sites for compound **1-c** (purple, Scheme S1) and IDFP (yellow), shown as stick  
 997 models. The hydrolase domain is shown in orange, cap domain in blue, lid in magenta, and membrane-binding  
 998 domain (MBD) in teal. (b) Closeup of **1-c** bound to the MBD, with  $|F_o|-|F_c|$  omit map density contoured at 3  $\sigma$  in  
 999 gray mesh. (c) LigPlot (Laskowski and Swindells, 2011) of **1-c** bound to LCAT showing interactions between  
 1000 protein and ligand. Hydrogen bonds are indicated by gray dashed lines with distances in Å. (d) IDFP attached to  
 1001 catalytic Ser181, with  $|F_o|-|F_c|$  omit map density contoured at 3  $\sigma$  in gray mesh. (e) LigPlot of IDFP bound  
 1002 covalently to LCAT at Ser181. The covalent point of attachment is indicated by a purple bond. Protein carbons are  
 1003 colored according to their respective domains or ligands (panel a), whereas nitrogens are blue, oxygens red, sulfurs  
 1004 yellow, and phosphate lime green.

1005 **Figure 3.**

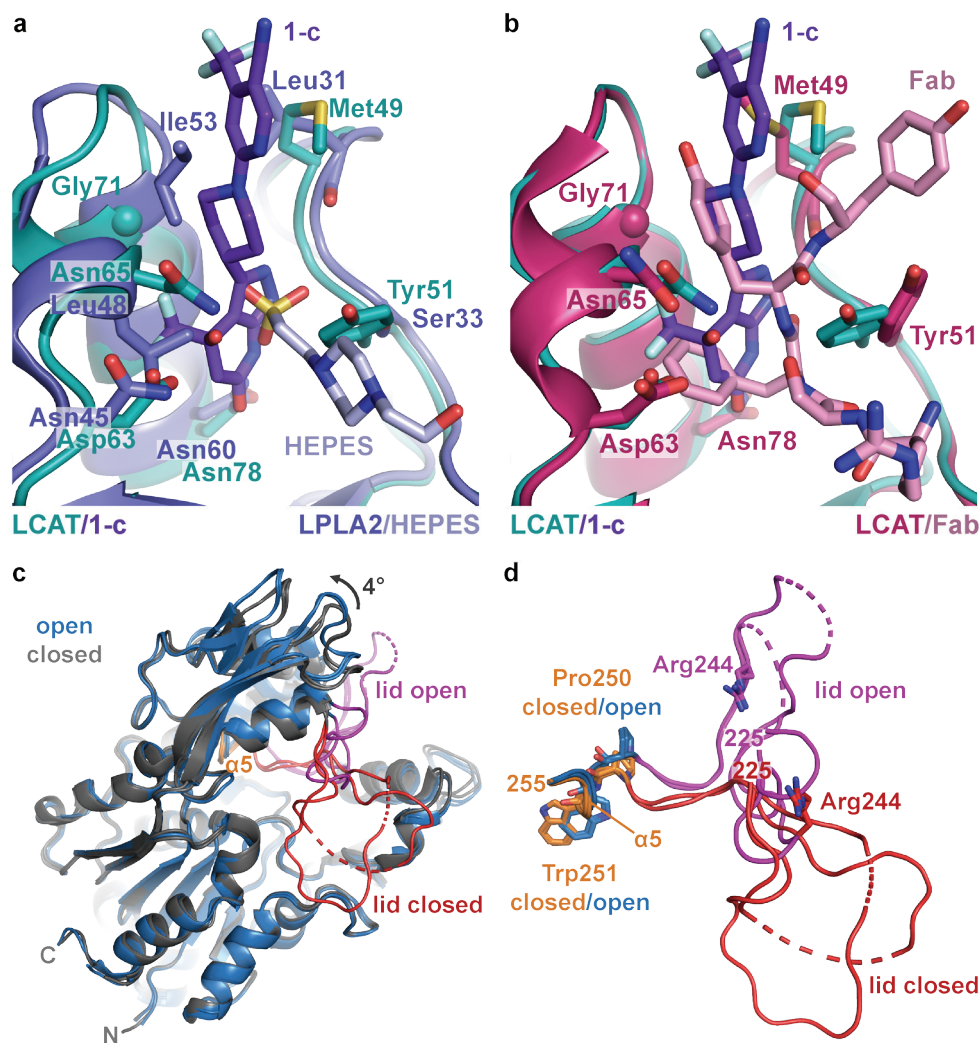

1006

1007 **Figure 3. Comparison of LCAT and LPLA2 structures.** (a)  $\Delta N\Delta C$ -IDFP-1 structure aligned with LPLA2 (blue, PDB entry 4X90) bound to HEPES (light blue). Residues that are not conserved within the binding pocket are labeled and shown as stick models. (b)  $\Delta N\Delta C$ -IDFP-1 structure aligned to the structure of 27C3-LCAT-Fab1 (dark pink, PDB entry 5BV7 with Fab1 shown in pink), highlighting residues that adjust conformation to accommodate the different ligands. (c) Four LCAT crystal structures aligned to show differences between the open and closed states. Closed (presumably inactive) structures are shown in gray (PDB entries 4XWG and 5TXF) with orange hinge and red lid. Open structures (structure reported here and 27C3-LCAT-Fab1) are shown in blue with magenta lid. Dashed lines indicate disordered residues. (d) Close up of structures from (c) only depicting the lid and hinge region. Hinge residues Pro250 and Trp251 and lid residue Arg244 are shown with stick side chains.

1016 **Figure 4.**

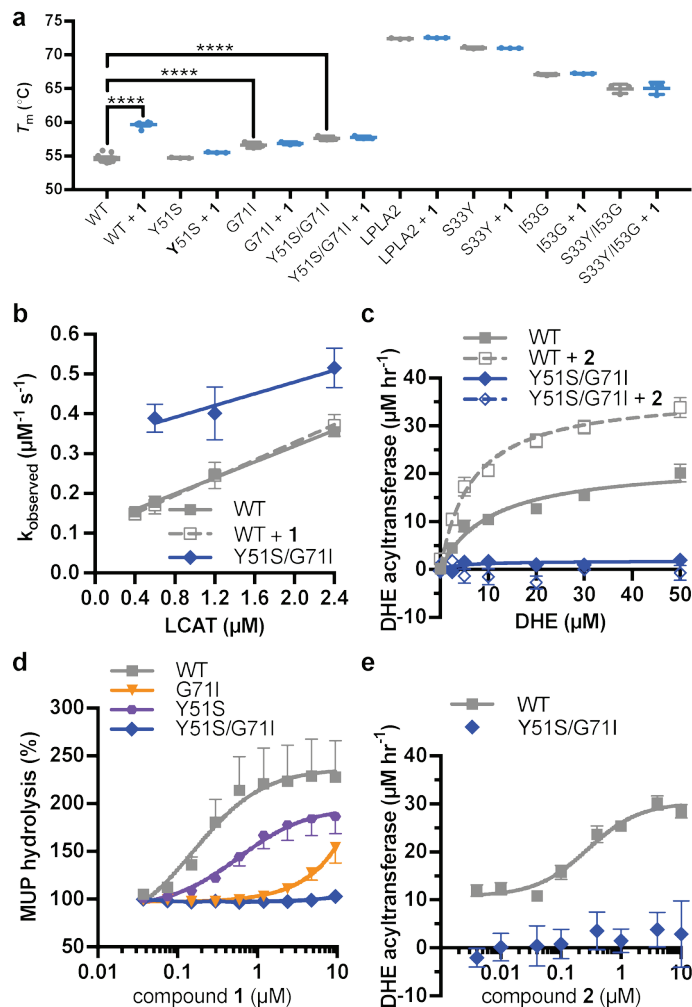

1017

1018 **Figure 4. Characterization of activator binding site mutants.** (a) Perturbation of the activator binding site leads  
 1019 to loss of responsiveness to **1**, although the G71I and Y51S/G71I variants are themselves stabilized compared to WT  
 1020 LCAT. LPLA2 variants, however, do not bind to **1**, and chimeric swaps are destabilized. Data are mean  $\pm$  s.e.m. of  
 1021 at least three independent experiments performed in duplicate. \*\*\*\*  $P < 0.0001$  by one-way analysis of variance  
 1022 followed by Tukey's multiple comparisons post-test. Each protein without ligand was compared to that same variant  
 1023 with **1**, and WT LCAT was compared to each LCAT variant. Non-significant comparisons are not shown. (b) Plot  
 1024 used to determine  $k_{on}$ ,  $k_{off}$ , and hence  $K_d$  from BLI data for LCAT binding to HDL. Data are mean  $\pm$  s.e.m. of three  
 1025 independent experiments. (c) DHE acyltransferase assay with peptide HDLs comparing the absence (solid lines) and  
 1026 presence (dashed lines) of  $5 \mu M$  **2**, which was used in this particular assay instead of **1** due to its lower background  
 1027 fluorescence. Data are mean  $\pm$  s.e.m. of three independent experiments performed in triplicate. (d) Titration of  
 1028 compound **1** in the MUP hydrolysis assay. Data were normalized to basal activity of 100% for each variant to give  
 1029 percent activation. Data are mean  $\pm$  s.e.m. of three independent experiments. (e) Titration of **2** in the DHE  
 1030 acyltransferase assay. Data are mean  $\pm$  s.e.m. of three independent experiments performed in triplicate.

1031 **Figure 5.**

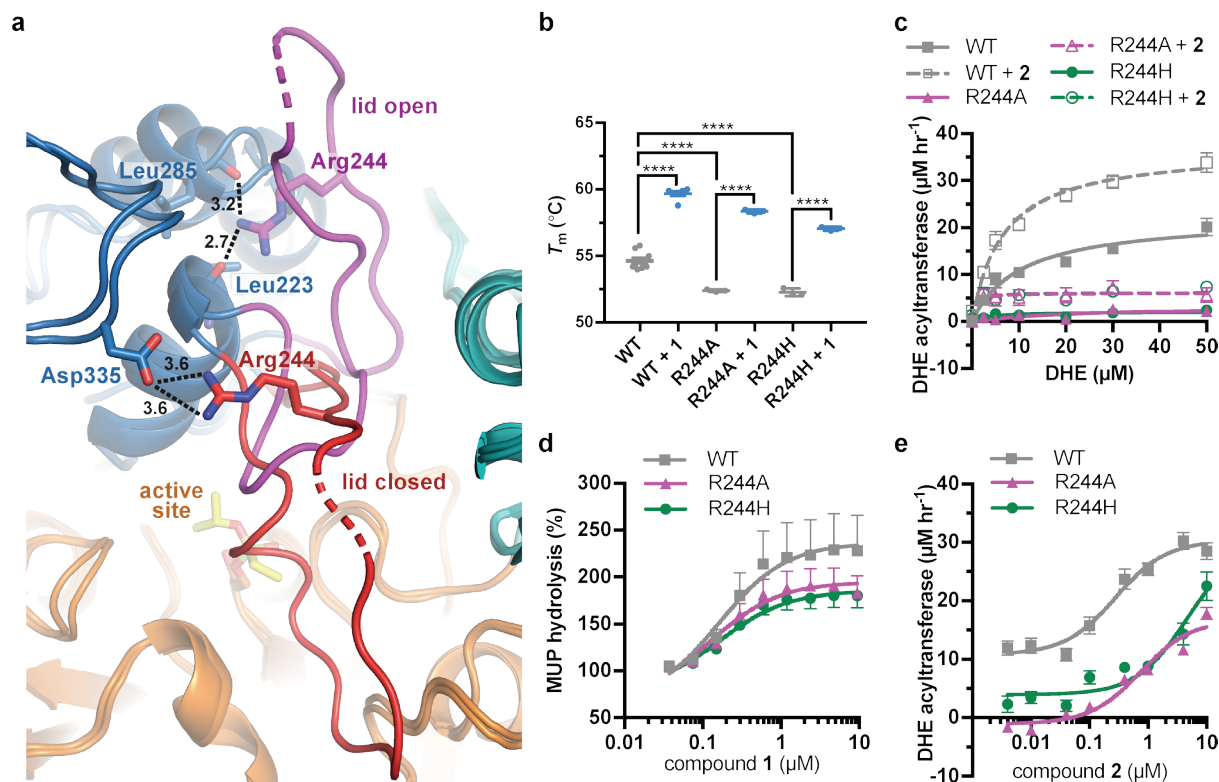

1032

1033 **Figure 5. LCAT-Arg244 variants can be partially rescued by LCAT activators.** (a) LCAT-Arg244 acts as part  
 1034 of a molecular switch that interacts with the backbone carbonyls of Leu223 and Leu285 in activated structures of  
 1035 LCAT (magenta lid). In an inactive structure (red lid, PDB entry 5TXF), Arg244 instead interacts with the side  
 1036 chain of Asp335. Hydrogen bonds are indicated by black dashed lines with distances in Å. (b) The Arg244 variants  
 1037 have lower  $T_m$  values relative to WT, yet **1** can stabilize each to the same extent. Data are mean  $\pm$  s.e.m. of at least  
 1038 three independent experiments performed in duplicate. \*\*\*\*  $P < 0.0001$  by one-way analysis of variance followed  
 1039 by Tukey's multiple comparisons post-test. (d) DHE acyltransferase assay with peptide-based HDLs comparing the  
 1040 absence (solid lines) and presence (dashed lines) of 5  $\mu\text{M}$  **2**. Data are mean  $\pm$  s.e.m. of three independent  
 1041 experiments performed in triplicate. (c) Titration of **1** in the MUP esterase assay. Data were normalized to basal  
 1042 activity of 100% for each variant to give percent activation. Data are mean  $\pm$  s.e.m. of three independent  
 1043 experiments. (d) Titration of compound **2** in the DHE acyltransferase assay. Data are mean  $\pm$  s.e.m. of three  
 1044 independent experiments performed in triplicate.



1045 **Figure 6.**

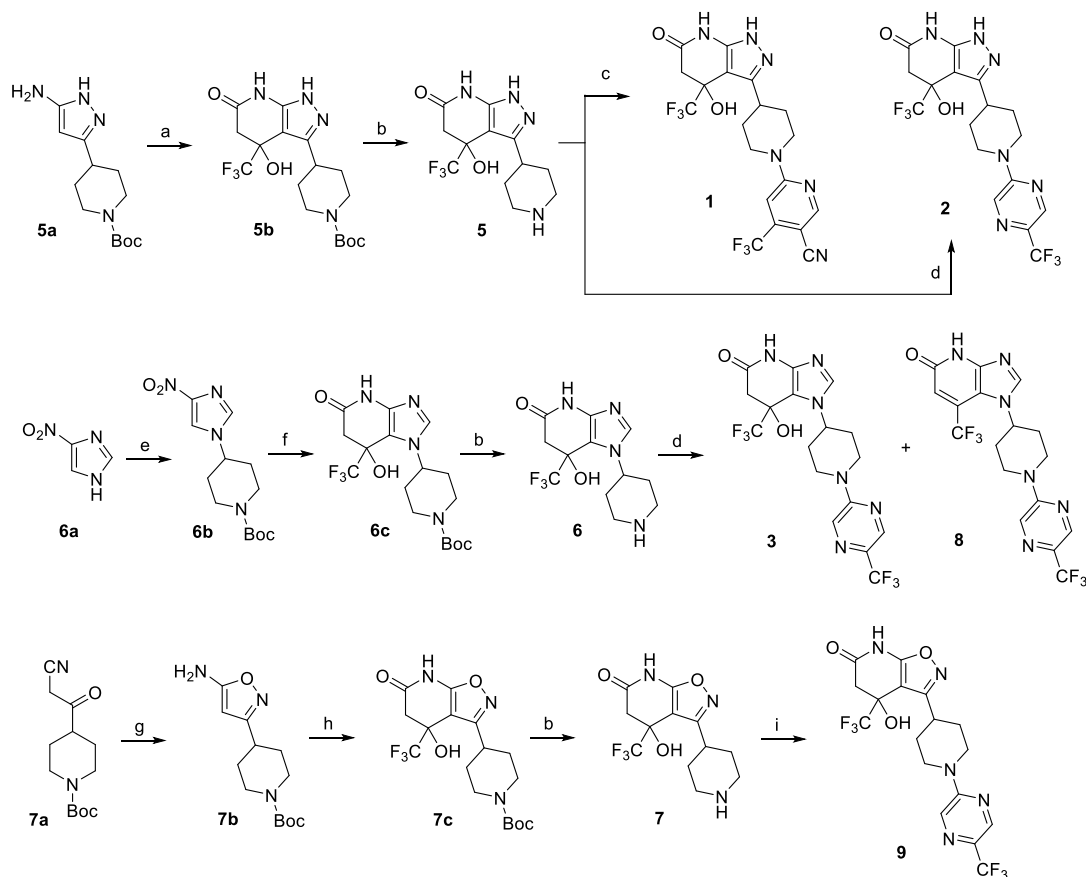

1046

1047 **Figure 6. Synthesis of piperidinylpyrazolopyridine and related compounds.** Reagents and conditions: (a) ethyl  
 1048 4,4,4-trifluoro-3-oxobutanoate, AcOH, 60 °C, 3 h, 57%. (b) HCl (4 M in 1,4-dioxane), 1,4-dioxane, 0 °C to RT, 2 h,  
 1049 **5** (96%), **6** (96%), **7** (83%). (c) 6-chloro-4-(trifluoromethyl)nicotinonitrile, Et<sub>3</sub>N, EtOH, RT, 1 h, 13%. (d) 2-chloro-  
 1050 5-(trifluoromethyl)pyrazine, (i-Pr)<sub>2</sub>NEt, DMSO, RT, 3 h, **2** (76%), **3** (76%), **8** (~9%). (e) tert-butyl 4-  
 1051 ((methylsulfonyl)oxy)piperidine-1-carboxylate, K<sub>2</sub>CO<sub>3</sub>, DMF, 110 °C, overnight, 38%. (f) H<sub>2</sub> balloon, cat. Pd/C,  
 1052 EtOH, RT, 2.5 h; then ethyl 4,4,4-trifluoro-3-oxobutanoate, EtOH/AcOH (~1:2), 65-70 °C, 2.5 h, 86%. (g)  
 1053 hydroxylamine HCl salt, Et<sub>3</sub>N, CH<sub>2</sub>Cl<sub>2</sub>, sealed, 55 °C, overnight, 88%. (h) ethyl 4,4,4-trifluoro-3-oxobutanoate,  
 1054 EtOH/AcOH (~1:2), 70 °C, 6 h, 64%. (i) 2-chloro-5-(trifluoromethyl)pyrazine, Et<sub>3</sub>N, DMF, RT, 3 h, 47%.

1055 **Figure S1.**

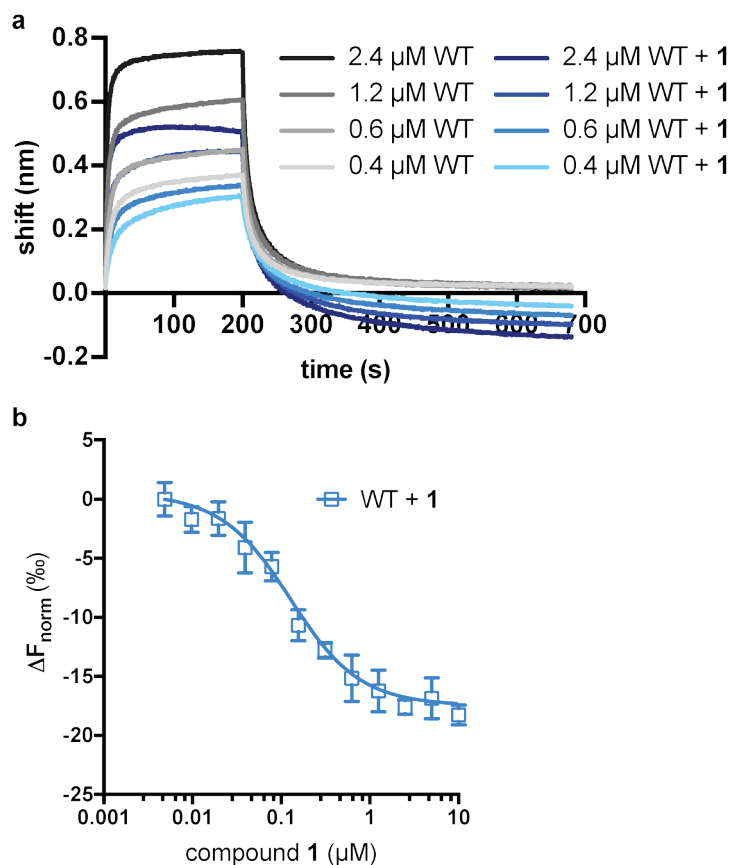

1056

1057 **Figure S1. Effects of LCAT binding to compound 1.** (a) LCAT analyzed with ApoA-I HDLs at different  
1058 concentrations in order to determine  $K_d$ . Raw data with WT LCAT is shown in black to gray, whereas WT in  
1059 complex with compound 1 is shown in navy to light blue. (b) Microscale thermophoresis (MST) data for compound  
1060 1 binding to LCAT with a  $K_d$  value of  $100 \pm 14$  nM.



1061 **Figure S2.**

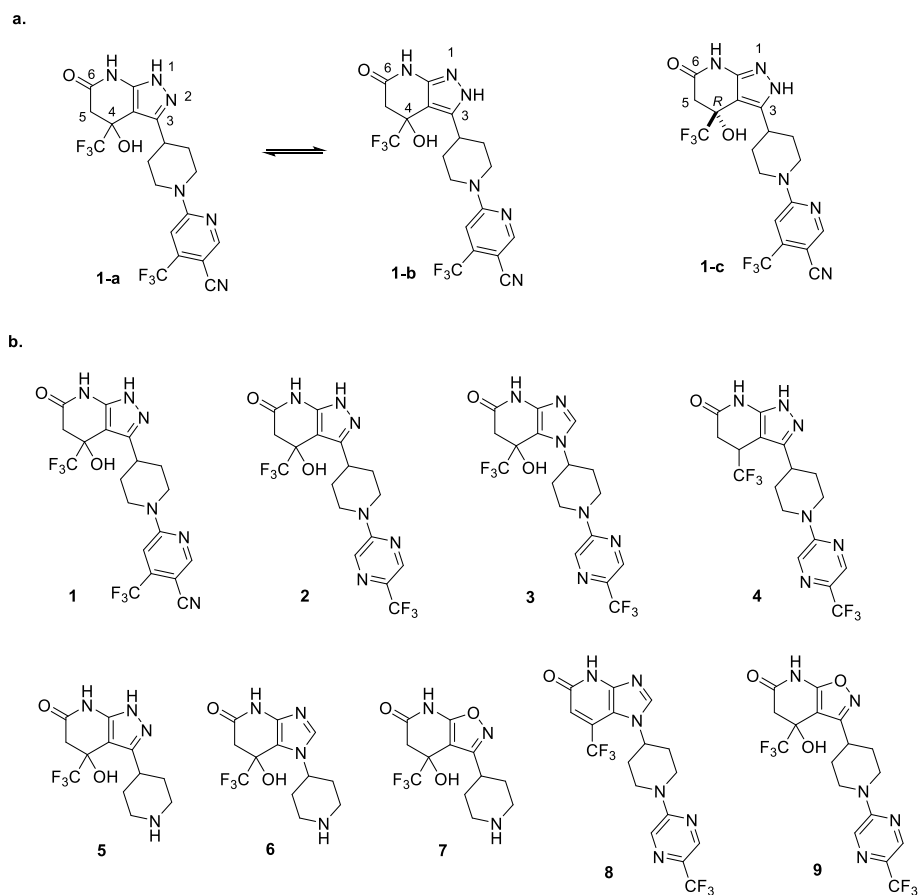

1062

1063 **Figure S2. Compound structures and numbers.** (a) 1-a and 1-b are tautomers of 1, and 1-b is the dominant  
1064 isoform in the co-crystal structure. 1 has a stereocenter at the C4 position and was synthesized as a racemic mixture,  
1065 however the binding site is only compatible with the *R* enantiomer, 1-c. (b) Structure of compounds 1 (patent  
1066 example 95 (Kobayashi et al., 2015a)), 2 (patent example 46 (Kobayashi et al., 2015a)), and 3 (patent example 3  
1067 (Onoda et al., 2015)) are the main compounds synthesized and examined in the text. Compound 4 (patent example  
1068 10 (Kobayashi et al., 2015b)) is referenced in text. Compounds 5-7 are the head groups of related compounds that  
1069 were synthesized as intermediates, and 8 and 9 were synthesized as part of the structure-activity relationships.

1070 **Figure S3.**

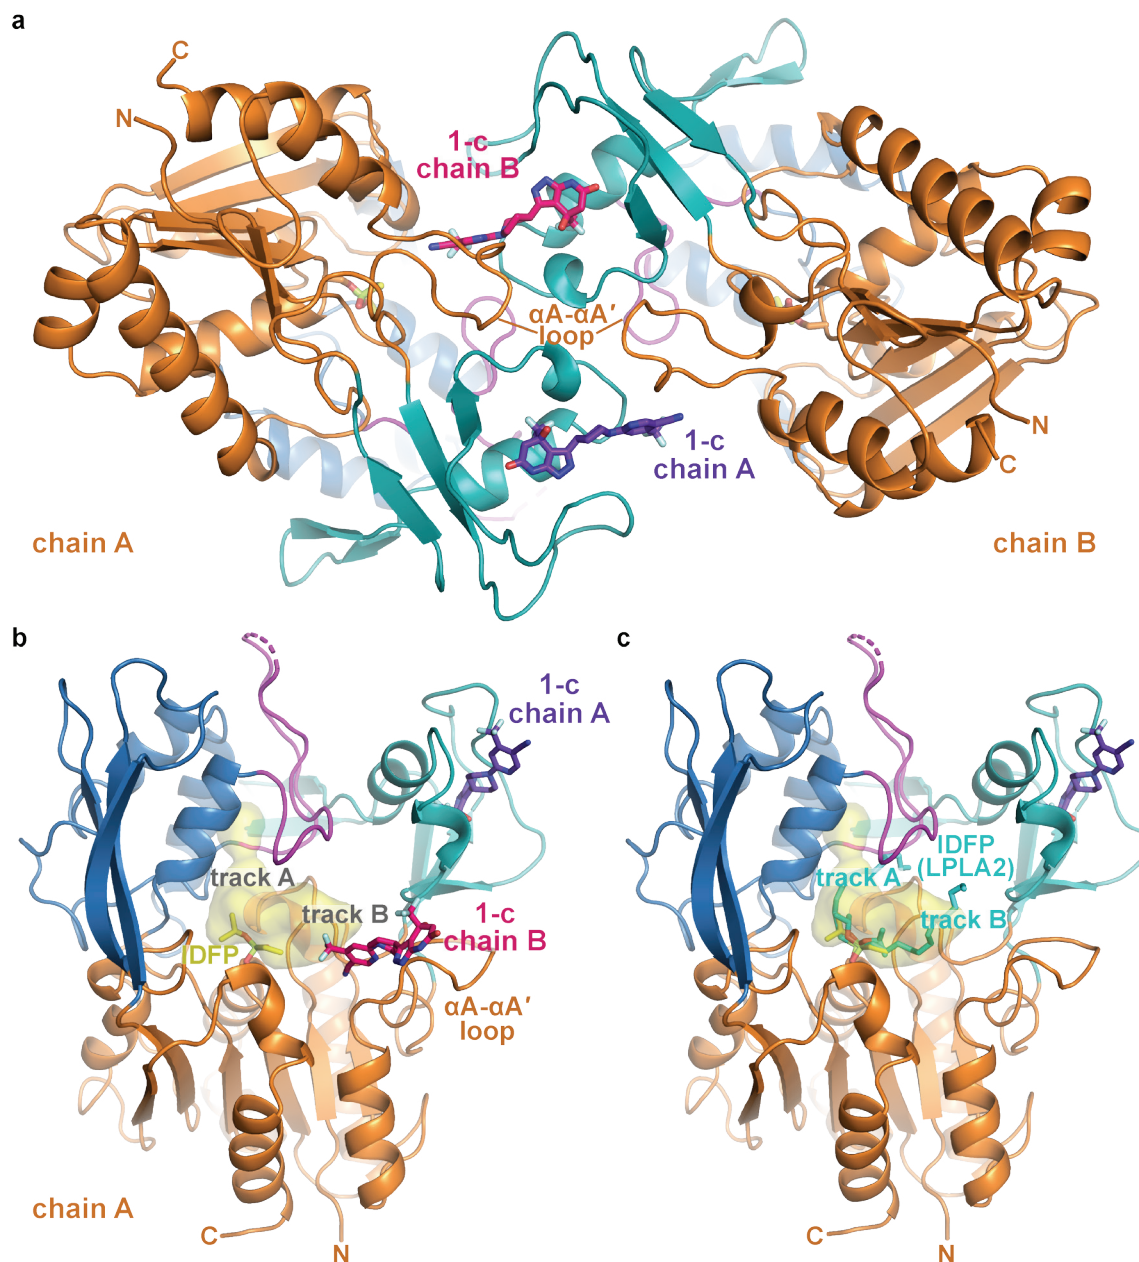

1071

1072 **Figure S3. Asymmetric unit of the  $\Delta N\Delta C$ -IDFP-1 crystals and interactions of compound 1-c.** (a) Compound 1-  
1073 c helps to bridge the two LCAT chains to form a pseudo 2-fold interface. (b) LCAT from chain A is shown with  
1074 compound 1-c from both chain A (bound to membrane binding domain, purple) and chain B (docking to track B in  
1075 the active site, pink). (c) For comparison, IDFP from the LPLA2-IDFP structure (PDB entry 4X91 chain A  
1076 (Glukhova et al., 2015)) is shown with cyan carbons after alignment of LPLA2 and LCAT. IDFP adopts two  
1077 different orientations in 4X91, thus revealing two potential tracks for acyl chains. The structure shown is of  $\Delta N\Delta C$ -  
1078 IDFP-1 with bound IDFP (yellow) and 1-c (purple). The LCAT substrate binding surface is highlighted in yellow.  
1079 The interior surface showing track A was created using HOLLOW (Ho and Gruswitz, 2008) and rendered in  
1080 PyMOL. The surface as shown only extends partially into track B because it is designed to show interior surfaces,  
1081 and track B is more exposed to solvent.

1082

1083 **Figure S4.**

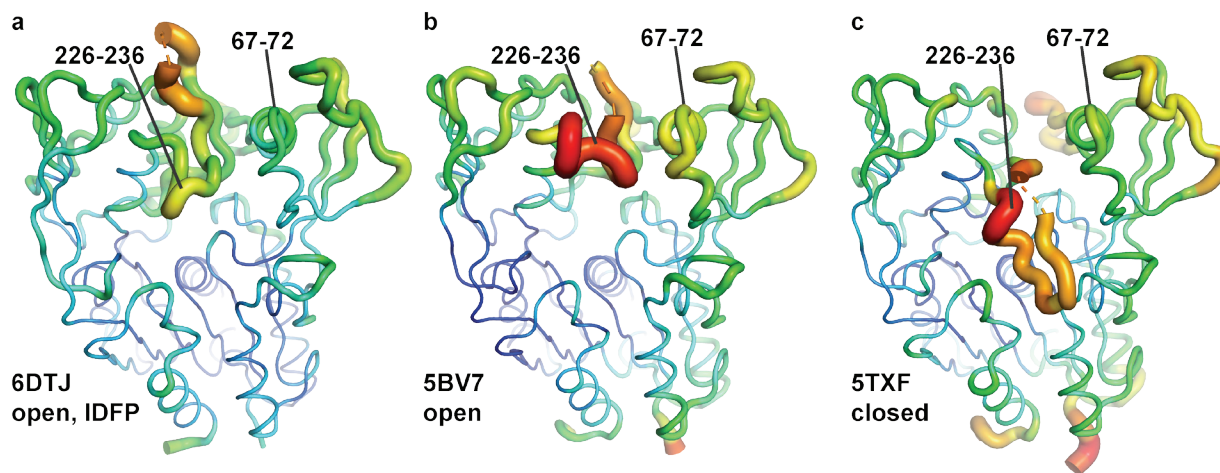

1084

1085 **Figure S4. The  $\Delta N\Delta C$ -IDFP·1 structure has lower temperature factors in the membrane binding domain and**  
1086 **lid. (a)  $\Delta N\Delta C$ -IDFP·1 open structure, (b) 27C3-LCAT-Fab1 open structure (Gunawardane et al., 2016), and (c)**  
1087 **LCAT-closed structure (Manthei et al., 2017) are shown using B-factor putty representation in PyMol. The blue to**  
1088 **green coloring and small tube width indicates lower B-factors whereas the yellow to red coloring and wide tube**  
1089 **indicates higher B-factors. Regions with lower B-factors for  $\Delta N\Delta C$ -IDFP·1 are indicated (residues 67-72 and 226-**  
1090 **236), which also had lower hydrogen-deuterium exchange (HDX) in the presence of IDFP (Manthei et al., 2017).**

1091 **Figure S5.**

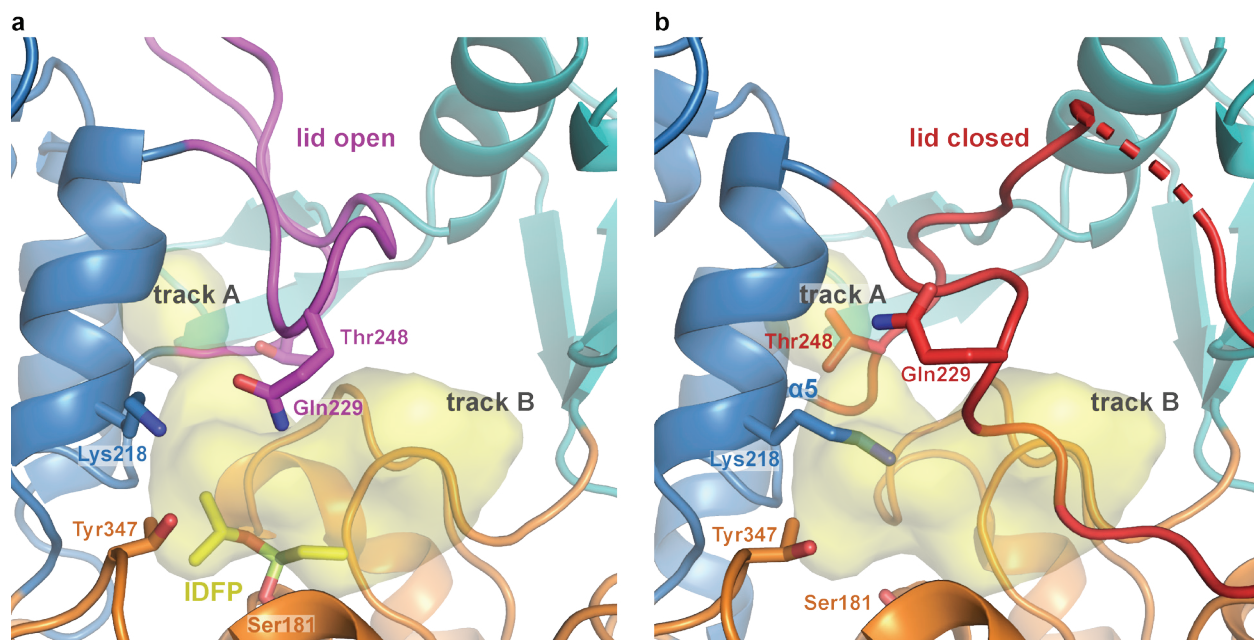

1092

1093 **Figure S5. Hinge and lid movement modulate lipid binding tracks.** (a) When the lid is open, both tracks are fully  
1094 available for acyl chain binding. Residues Lys218, Gln229, and Tyr347 are in position to coordinate phosphate in  
1095 the lipid head group. The structure shown is of  $\Delta N\Delta C$ -IDFP·1 with bound IDFP (yellow). The LCAT substrate  
1096 binding surface is highlighted in yellow. The interior surface showing track A was created using HOLLOW (Ho and  
1097 Gruswitz, 2008) and rendered in PyMOL. The surface as shown only extends partially into track B because it is  
1098 designed to show interior surfaces, and track B is more exposed to solvent. (b) When the lid is closed, track A  
1099 becomes blocked by the hinge and lid movement, and specifically the  $\alpha 5$  helix causes Thr248 to block the back of  
1100 track A. Lys218 also occludes part of the binding site and portions of the lid pack in track B. The structure shown is  
1101 LCAT-closed (PDB code 5TXF (Manthei et al., 2017)).

1102 **Figure S6.**

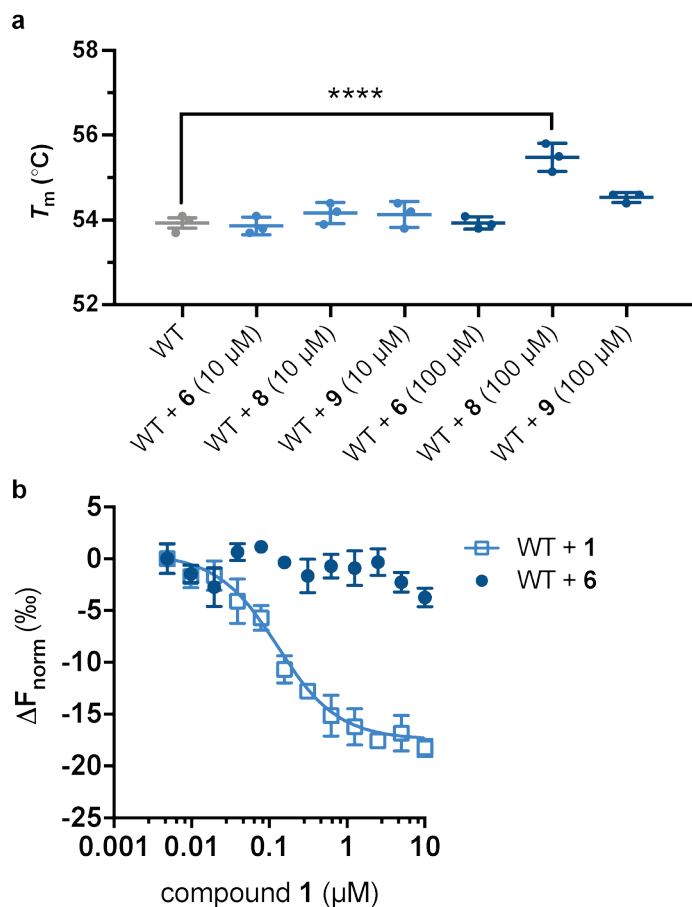

1103

1104 **Figure S6. Structure-activity relationships.** (a) Compounds **6**, **8**, and **9** do not stabilize WT LCAT at 10  $\mu$ M, but **8**  
1105 does at 100  $\mu$ M. Differential scanning fluorescent (DSF) data are mean  $\pm$  s.e.m. of at least three independent  
1106 experiments performed in duplicate. \*\*\*\*  $P < 0.0001$  by one-way analysis of variance followed by Tukey's multiple  
1107 comparisons post-test. WT LCAT without ligand was compared to WT with compound and non-significant  
1108 comparisons are not shown. (b) MST data showing that **6** does not bind to WT LCAT, whereas **1** does.

1109 **Figure S7.**

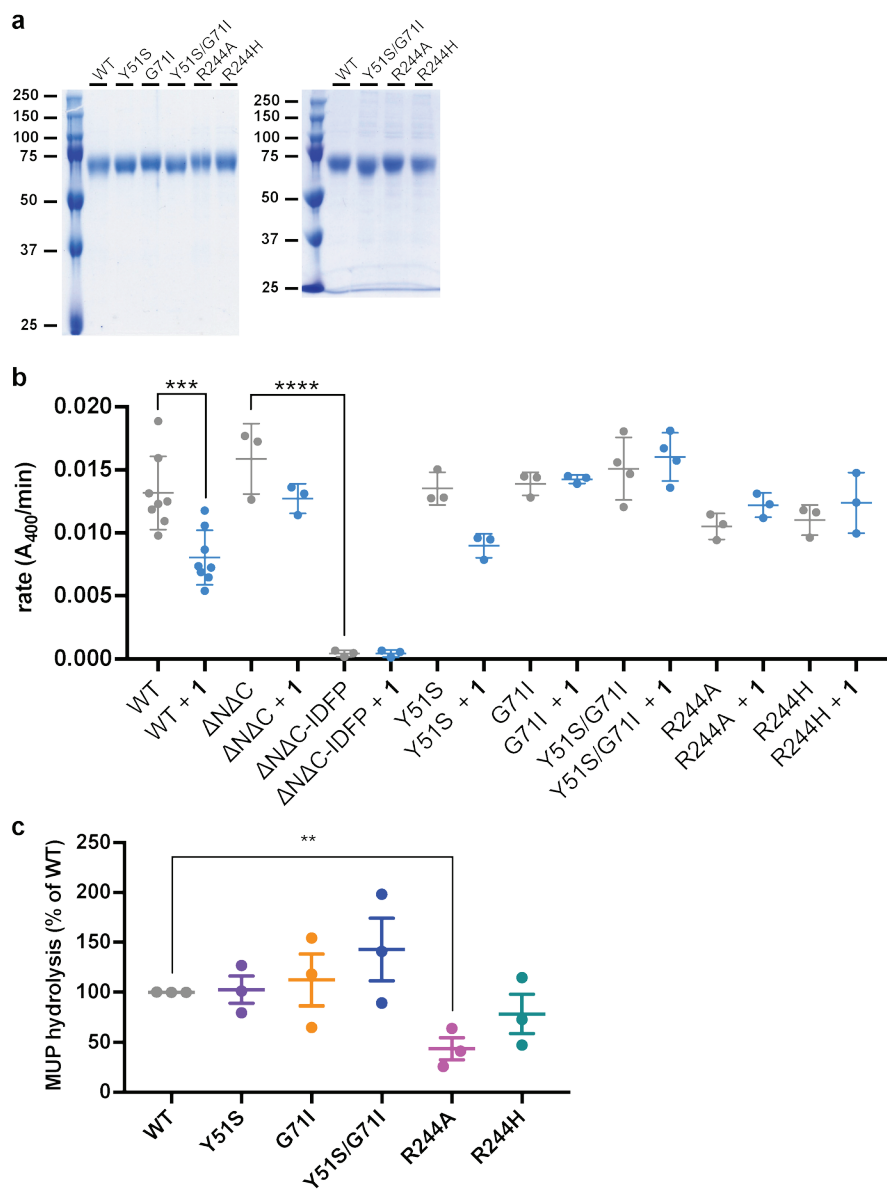

1110

1111 **Figure S7. Biochemical characterization of LCAT variants.** (a) SDS-PAGE gels of purified LCAT variants. Left  
 1112 panel shows representative variants used in pNPB, MUP, and DSF experiments that were polished via Superdex 75.  
 1113 Right panel shows representative variants used for DHE acyltransferase and BLI assays. Approximately 1.5 μg of  
 1114 each purified LCAT variant was loaded in each lane. (b) Rates of pNPB hydrolysis for LCAT variants. Data are  
 1115 mean ± s.e.m. of at least three independent experiments. \*\*\*  $P = 0.0004$ , \*\*\*\*  $P < 0.0001$  by one-way analysis of  
 1116 variance followed by Tukey's multiple comparisons post-test. Each protein without ligand was compared to that  
 1117 same variant with ligand, and WT LCAT was compared to each LCAT variant. Non-significant comparisons are not  
 1118 shown. (c) Comparison of basal MUP hydrolysis. Data are mean ± s.e.m. of three independent experiments  
 1119 performed with  $\geq 27$  repeats. \*\*  $P = 0.0070$  by a two-tailed unpaired t test. WT was compared to each LCAT variant  
 1120 and non-significant comparisons are not shown.



1121 **Figure S8.**

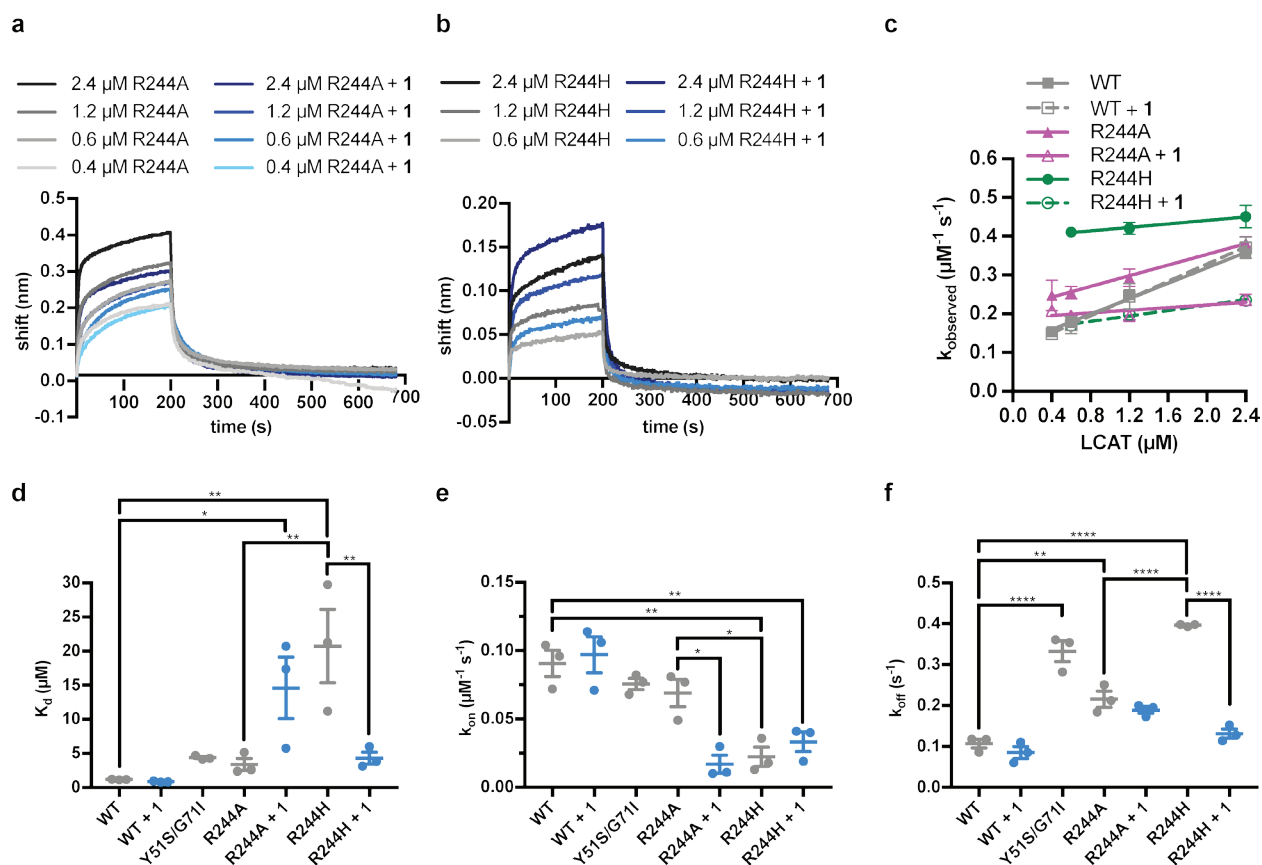

1122

1123 **Figure S8. Representative BLI data for LCAT-Arg244 variants.** (a) LCAT analyzed with ApoA-I HDLs at  
 1124 different concentrations in order to determine  $K_d$ . R244A is in black to gray, whereas R244A with compound **1** is  
 1125 in navy to light blue. (b) Same as in (a) but with R244H. (c) Plot used to determine  $k_{\text{on}}$  (slope of fit line),  $k_{\text{off}}$  (y-  
 1126 intercept), and hence  $K_d$  for LCAT binding to HDL. Data are mean  $\pm$  s.e.m. of three independent experiments. (d) –  
 1127 (f) Individual  $K_d$  (d),  $k_{\text{off}}$  (e), and  $k_{\text{on}}$  (f) values were calculated for each experiment. Data are mean  $\pm$  s.e.m. of three  
 1128 independent experiments. \*  $0.01 < P < 0.05$ , \*\*  $0.001 < P < 0.01$ , \*\*\*  $0.0001 < P < 0.001$ , \*\*\*\*  $P < 0.0001$  by one-  
 1129 way analysis of variance followed by Tukey's multiple comparisons post-test. Each protein without ligand was  
 1130 compared to that same variant with **1**, and WT LCAT was compared to each dataset. R244A was also compared to  
 1131 R244H, and non-significant comparisons are not shown.

1132 **Figure S9.**

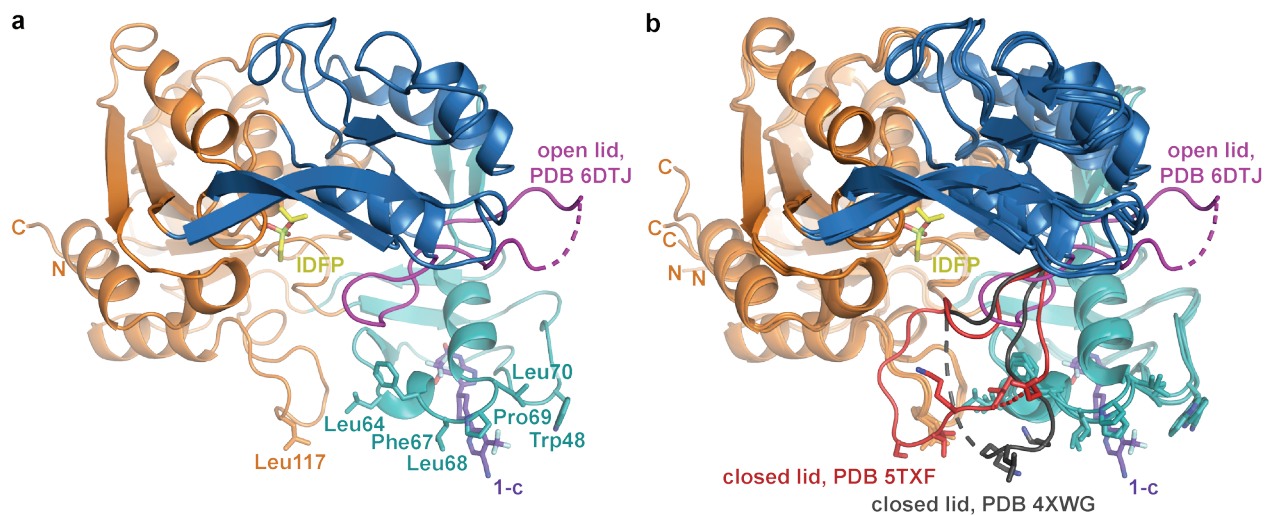

1133

1134 **Figure S9. The activator molecule contributes to a hydrophobic surface.** (a)  $\Delta N\Delta C$ -IDFP·1 oriented so that  
1135 hydrophobic residues from the membrane binding domain and  $\alpha A$ - $\alpha A'$  loop are all in a plane along bottom of the  
1136 panel. The pyrazine ring of **1** (purple sticks) also contributes to this plane. The active site lid is shown in magenta.  
1137 (b) When the lid closes, this interface is partially blocked. The lid from PDB entry 5TXF is shown in red (Manthei  
1138 et al., 2017), and that of PDB entry 4XWG is shown in gray (Piper et al., 2015).



1139 **Movie S1. Transition between closed and open conformations of LCAT.** The movie  
1140 highlights the opening of the lid and corresponding cap domain movements that occur upon  
1141 LCAT activation. Arg244 and the residues it interacts with in each conformation, as well as the  
1142 active site location Ser181 are shown as sticks. Chimera (Pettersen et al., 2004) was used to  
1143 morph from the closed structure (PDB entry 5TXF (Manthei et al., 2017)) to the activator  
1144 structure. The movie was rendered using PyMOL.

1145

1146 **Movie S2. Movement corresponding to the hinge region.** The same morph as depicted in  
1147 Movie S1, but zoomed in on the lid and hinge region. The closed (presumably inactive) structure  
1148 (PDB entry 5TXF (Manthei et al., 2017)) is shown with orange hinge and red lid. The  $\Delta$ N $\Delta$ C-  
1149 IDFP-1 structure is shown in blue with magenta lid as well as the morph. Dashed lines indicate  
1150 disordered residues. Hinge residues Pro250 and Trp251 are shown with stick side chains, as well  
1151 as Arg244 in the lid region. The position of the C $\alpha$  atom of Gly230 is indicated with a sphere.
